# Supplementary material for: RNAseq shows an all-pervasive day-night rhythm in the transcriptome of the pacemaker of the heart
Source: PubMed Central journal article supplement (PMC7878777; doi:10.1038/s41598-021-82202-7), 2021-02-11
Supplement: 41598_2021_82202_MOESM1_ESM.pdf [file 41598_2021_82202_MOESM1_ESM.pdf]

## SUPPLEMENTARY INFORMATION

### RNAseq shows an all-pervasive day-night rhythm in the transcriptome of the pacemaker of the heart

Yanwen Wang, Cali Anderson, Halina Dobrzynski, George Hart, Alicia D'Souza and Mark R. Boyett

#### Supplementary Discussion

##### Phasing of transcripts

Fig. 7J shows that there was no overall pattern in the transcripts peaking early and late during a 24 h day-night cycle. However, some comments can be made. Regarding the pacemaker *Hcn* transcripts, *Hcn2*, *Hcn3* and *Hcn4* peaked early in the sleep period, whereas *Hcn1* peaked late in the awake period (Fig. 2). This may be important, because the HCN1 channel has faster kinetics and a poorer cAMP sensitivity than the HCN2 and HCN4 isoforms<sup>1</sup>. A switch from the HCN2 and HCN4 isoforms to the HCN1 isoform over 24 h could, therefore, have an impact on pacemaking. Fig. 3 shows that many Ca<sup>2+</sup> clock transcripts (*Cacna2d1*, *Cacnb2*, *Cacnb4*, *Ryr2*, *Slc8a1*, *Atp2b1*, *Atp2b4*) peaked late in the awake period. Curiously, many adrenergic receptors (*Adrb1*, *Adrb2*, *Adrb3*, *Adra1b*; Figs. 4 and S5) peaked early in the sleep period, whereas the muscarinic receptor peaked late in the awake period (Fig. S6). Many but not all transcripts related to metabolism (involved in the citric acid cycle, acyl-CoA transport, fatty acid  $\beta$ -oxidation and glycolysis) peaked early in the sleep period (Figs. 5 and S12-S14). Could this reflect a build-up of energy reserves in the sleep period?

The significance of the fact that many pathways contain some transcripts peaking in the sleep period and others peaking in the awake period as shown in Fig. 7J is not known. It is likely that this is significant, for example as suggested above in the case of the HCN channels.

##### Limitations of the study

During analysis of the data using JTK Cycle, the period was set at 24 h. *In vivo*, it is most likely that in an animal under normal 12 h light-12 h dark conditions, the period of a day-night rhythm will be 24 h. There are examples of day-night rhythms with a period of 12 h, but they few in number and more than six measurements over 24 h would be needed to detect them<sup>2</sup>. It is theoretically possible that the period could be longer than 24 h, but no precedents are known and measurements over more than 24 h would be needed to detect them. Only the most abundant transcripts were analysed based on the assumption that poorly expressed transcripts will play little or no role and this assumption may not be strictly correct.

A concern is that the general abundance of a transcript may influence the likelihood of reporting a false negative. To assess this, the adjusted P value was plotted against the average abundance of the transcript over 24 h. Regardless of whether significant transcripts only were considered or non-significant as well as significant transcripts were considered, there was no correlation.

In this study, the transcriptome but not the proteome was studied, and this is an important limitation, because, although 44% of the transcriptome displayed a significant circadian rhythm, the functional consequences of these changes remains an uncertainty until the proteome is measured.

##### Validation of RNAseq

For RNAseq to be validated, it should be compared to a more accurate technique. RNAseq (1) gives absolute transcript numbers, (2) detects differences in expression of ~10% and (3) has a virtually unlimited dynamic range. Could quantitative PCR (qPCR) be used to validate RNAseq? However, qPCR only gives fold changes with respect to a reference or housekeeper transcript. Therefore, it gives relative rather than absolute expression. Our experience is that with n=8 tissue samples we cannot detect changes as small as 10% using qPCR. qPCR also has a restricted dynamic range. An important weakness of qPCR is the need to normalise data to a reference or housekeeper transcript, which is one that is constant in different samples and conditions; experience shows that this constancy is difficult to assess, prove and obtain. In summary, qPCR is likely to be less accurate than RNAseq and therefore should not be used to validate RNAseq. Another shortcoming of qPCR is that it can only be used for a relatively few pre-identified transcripts (using pre-designed probes); RNAseq in contrast can be used to measure perhaps all or at least a substantial fraction of the entire transcriptome including unknown as well as known transcripts. Therefore, it would be impossible to

validate all of the RNAseq data using qPCR. Despite these arguments, expression of 19 circadian clock transcripts was measured using both RNAseq and qPCR and there was a significant correlation between the two ( $P < 0.0001$ ).

## Data Supplement files

Supplementary data files are available for download on <https://www.nature.com/articles/s41598-021-82202-7>. For different functional groups, each file (Excel) shows the transcript, the statistical significance of a day-night rhythm (permutation-based P value calculated using JTK Cycle), the lag time (the zeitgeber time at which expression reaches a peak), and the amplitude of the day-night change (normalised reads or counts). Transcripts showing a significant day-night rhythm are highlighted in yellow. The files relate to Table 1.

HistoneAcetyltransferases.xlsx  
CircadianClock.xlsx  
TCACycle.xlsx  
EukaryoticInitiationFactors.xlsx  
CaMKIIpathway.xlsx  
CaClock.xlsx  
Glycolysis.xlsx  
AutonomicReceptorsPathways.xlsx  
MitochondrialSlc25Transporters.xlsx  
HistoneDeacetylases.xlsx  
TranscriptionFactors.xlsx  
FattyAcidBetaOxidation.xlsx  
UbiquitinAndProteasome.xlsx  
GproteinSubunits.xlsx  
AllTranscripts.xlsx  
ElectronTransportChain.xlsx  
RNAPolymerases.xlsx  
SoluteSlcCarriers.xlsx  
CalciumIonTransport.xlsx  
GproteinCoupledReceptors.xlsx  
ExtracellularMatrix.xlsx  
IonChannelSubunits.xlsx  
GapJunctionSubunits.xlsx

Enriched pathways peaking in the sleep and awake periods (Fig. 7J) are given in the file below; data were analysed through the use of IPA (QIAGEN Inc., <https://www.qiagenbioinformatics.com/products/ingenuitypathway-analysis>)<sup>3</sup>.

Enriched pathways at ZT 2-8 and ZT 16-18h.xlsx

## References

1. Altomare C, Terragni B, Brioschi C, Milanese R, Pagliuca C, Viscomi C, Moroni A, Baruscotti M, DiFrancesco D. Heteromeric HCN1-HCN4 channels: a comparison with native pacemaker channels from the rabbit sinoatrial node. *Journal of Physiology*. 2003;549:347-359.
2. Thosar SS, Butler MP, Shea SA. Role of the circadian system in cardiovascular disease. *Journal of Clinical Investigation*. 2018;128:2157-2167.
3. Krämer A, Green J, Pollard J, Jr., Tugendreich S. Causal analysis approaches in Ingenuity Pathway Analysis. *Bioinformatics*. 2014;30:523-30.
4. Eppinga RN, Hagemeijer Y, Burgess S, Hinds DA, Stefansson K, Gudbjartsson DF, van Veldhuisen DJ, Munroe PB, Verweij N, van der Harst P. Identification of genomic loci associated with resting heart rate and shared genetic predictors with all-cause mortality. *Nature Genetics*. 2016;48:1557-1563.
5. Mezzavilla M, Iorio A, Bobbo M, D'Eustacchio A, Merlo M, Gasparini P, Ulivi S, Sinagra G. Insight into genetic determinants of resting heart rate. *Gene*. 2014;545:170-174.
6. Ramírez J, Duijvenboden Sv, Ntalla I, Mifsud B, Warren HR, Tzanis E, Orini M, Tinker A, Lambiase PD, Munroe PB. Thirty loci identified for heart rate response to exercise and recovery implicate autonomic nervous system. *Nature Communications*. 2018;9:1947.
7. Nagy R, Boutin TS, Marten J, Huffman JE, Kerr SM, Campbell A, Evenden L, Gibson J, Amador C, Howard DM, Navarro P, Morris A, Deary IJ, Hocking LJ, Padmanabhan S, Smith BH, Joshi P, Wilson JF, Hastie ND, Wright AF, McIntosh AM, Porteous DJ, Haley CS, Vitart

- V, Hayward C. Exploration of haplotype research consortium imputation for genome-wide association studies in 20,032 Generation Scotland participants. *Genome Medicine*. 2017;9:23.
8. Eijgelsheim M, Newton-Cheh C, Sotoodehnia N, de Bakker PIW, Müller M, Morrison AC, Smith AV, Isaacs A, Sanna S, Dörr M, Navarro P, Fuchsberger C, Nolte IM, de Geus EJC, Estrada K, Hwang S-J, Bis JC, Rückert I-M, Alonso A, Launer LJ, Hottenga JJ, Rivadeneira F, Noseworthy PA, Rice KM, Perz S, Arking DE, Spector TD, Kors JA, Aulchenko YS, Tarasov KV, Homuth G, Wild SH, Marroni F, Gieger C, Licht CM, Prineas RJ, Hofman A, Rotter JI, Hicks AA, Ernst F, Najjar SS, Wright AF, Peters A, Fox ER, Oostra BA, Kroemer HK, Couper D, Völzke H, Campbell H, Meitinger T, Uda M, Witteman JCM, Psaty BM, Wichmann HE, Harris TB, Kääb S, Siscovick DS, Jamshidi Y, Uitterlinden AG, Folsom AR, Larson MG, Wilson JF, Penninx BW, Snieder H, Pramstaller PP, van Duijn CM, Lakatta EG, Felix SB, Gudnason V, Pfeufer A, Heckbert SR, Stricker BHC, Boerwinkle E, O'Donnell CJ. Genome-wide association analysis identifies multiple loci related to resting heart rate. *Human Molecular Genetics*. 2010;19:3885-3894.
  9. Reed GJ, Boczek NJ, Etheridge SP, Ackerman MJ. CALM3 mutation associated with long QT syndrome. *Heart Rhythm*. 2015;12:419-422.
  10. Cheung JY, Zhang X-Q, Song J, Gao E, Rabinowitz JE, Chan TO, Wang J. Phospholemman: a novel cardiac stress protein. *Clinical and Translational Science*. 2010;3:189-196.
  11. Kreusser MM, Backs J. Integrated mechanisms of CaMKII-dependent ventricular remodeling. *Frontiers in Pharmacology*. 2014;5:36.
  12. Rose BA, Force T, Wang Y. Mitogen-activated protein kinase signaling in the heart: angels versus demons in a heart-breaking tale. *Physiological Reviews*. 2010;90:1507-46.
  13. Redwood CS, Moolman-Smook JC, Watkins H. Properties of mutant contractile proteins that cause hypertrophic cardiomyopathy. *Cardiovascular Research*. 1999;44:20-36.

**Table S1. Day-night rhythm in ion channels.** The table shows the ion channel transcript, the statistical significance of a day-night rhythm (permutation-based P value calculated using JTK Cycle), the lag time (the zeitgeber time at which expression reaches a peak), the average expression (normalised reads or counts) over 24 h (based on measurements at six time points over 24 h and n=3 mice at each time point), the amplitude of the day-night change (normalised reads or counts), and the amplitude of the day-night change as a percentage of the average expression. The amplitude is the change in the transcript from the mean and, therefore, the total change from day to night is 2×amplitude. Ion channel subunits showing a significant day-night rhythm are highlighted.

| <b>Ion channel subunit</b> | <b>Permutation-based P value</b> | <b>Lag time (h)</b> | <b>Average (normalised reads)</b> | <b>Amplitude (normalised reads)</b> | <b>Amplitude/average (%)</b> |
|----------------------------|----------------------------------|---------------------|-----------------------------------|-------------------------------------|------------------------------|
| <i>Chrb4</i>               | 3.71E-05                         | 6                   | 320.997755                        | 153.35743                           | 47.7752344                   |
| <i>Trpm7</i>               | 0.000103647                      | 16                  | 852.932788                        | 506.002526                          | 59.3250175                   |
| <i>Cacnb1</i>              | 0.000103647                      | 4                   | 429.403206                        | 125.163346                          | 29.1482094                   |
| <i>Kcnj2</i>               | 0.000167488                      | 20                  | 559.648992                        | 245.70297                           | 43.9030489                   |
| <i>Kcnk3</i>               | 0.000265156                      | 4                   | 11277.4541                        | 3258.2501                           | 28.8917168                   |
| <i>Kcng2</i>               | 0.000942737                      | 2                   | 3520.29257                        | 741.476027                          | 21.0629092                   |
| <i>Itpr1</i>               | 0.000942737                      | 18                  | 1425.4757                         | 447.01348                           | 31.3588986                   |
| <i>Clcn3</i>               | 0.000942737                      | 16                  | 821.166884                        | 316.038966                          | 38.4865698                   |
| <i>Kcna6</i>               | 0.000942737                      | 6                   | 485.811463                        | 173.846183                          | 35.7847018                   |
| <i>Chrb2</i>               | 0.000942737                      | 8                   | 71.6064121                        | 32.9988581                          | 46.0836636                   |
| <i>Gja5</i>                | 0.001392373                      | 6                   | 2266.78102                        | 1221.10367                          | 53.8695027                   |
| <i>Pkd2</i>                | 0.001392373                      | 18                  | 1275.69728                        | 618.749178                          | 48.5028218                   |
| <i>Grik5</i>               | 0.001392373                      | 6                   | 697.521165                        | 133.994613                          | 19.2101143                   |
| <i>Gria3</i>               | 0.001392373                      | 18                  | 193.460124                        | 116.574635                          | 60.2577071                   |
| <i>Trpv2</i>               | 0.001392373                      | 6                   | 260.946812                        | 49.6414583                          | 19.0235925                   |
| <i>Kcnc4</i>               | 0.001392373                      | 6                   | 110.763551                        | 45.2672065                          | 40.8683237                   |
| <i>Ano10</i>               | 0.002026164                      | 6                   | 1749.39937                        | 375.938069                          | 21.489551                    |
| <i>Gabra3</i>              | 0.002026164                      | 18                  | 416.270824                        | 143.173727                          | 34.39437                     |
| <i>Ano4</i>                | 0.002026164                      | 18                  | 285.104374                        | 120.305716                          | 42.1970781                   |
| <i>Clic5</i>               | 0.002907354                      | 18                  | 4083.14028                        | 1985.71477                          | 48.6320487                   |
| <i>Clcn2</i>               | 0.002907354                      | 12                  | 219.407273                        | 52.4328889                          | 23.8975163                   |
| <i>Kcns3</i>               | 0.002907354                      | 8                   | 78.7105044                        | 38.6571781                          | 49.1131118                   |
| <i>Clcn4</i>               | 0.004116638                      | 18                  | 2497.8088                         | 736.41614                           | 29.4824864                   |
| <i>Gabre</i>               | 0.004116638                      | 16                  | 222.248774                        | 115.83378                           | 52.1189734                   |
| <i>Itpr2</i>               | 0.004116638                      | 16                  | 630.655508                        | 107.113168                          | 16.984418                    |
| <i>Trpc1</i>               | 0.004116638                      | 18                  | 166.661756                        | 80.3128043                          | 48.1891024                   |
| <i>Cacng7</i>              | 0.004116638                      | 6                   | 294.501049                        | 45.3585519                          | 15.4018303                   |
| <i>Kcnj3</i>               | 0.005755688                      | 16                  | 6604.58281                        | 2930.18506                          | 44.3659372                   |
| <i>Cacnb2</i>              | 0.005755688                      | 18                  | 1366.3809                         | 552.468936                          | 40.4330106                   |
| <i>Chrb1</i>               | 0.005755688                      | 18                  | 260.393722                        | 66.9497287                          | 25.7109611                   |
| <i>Clcnkb</i>              | 0.005755688                      | 20                  | 17.8579937                        | 4.55825545                          | 25.5250144                   |
| <i>Cacna2d1</i>            | 0.007951044                      | 18                  | 1119.34669                        | 584.184209                          | 52.1897473                   |
| <i>Cacnb4</i>              | 0.007951044                      | 18                  | 44.9406593                        | 24.7954268                          | 55.173705                    |
| <i>Asic2</i>               | 0.007951044                      | 6                   | 28.6033305                        | 14.3923462                          | 50.3170293                   |
| <i>Cftr</i>                | 0.007951044                      | 14                  | 10.740125                         | 5.86228713                          | 54.583044                    |

Table S1 continued.

| Ion channel subunit | Permutation-based P value | Lag time (h) | Average (normalised reads) | Amplitude (normalised reads) | Amplitude/average (%) |
|---------------------|---------------------------|--------------|----------------------------|------------------------------|-----------------------|
| <i>Clic1</i>        | 0.010858335               | 4            | 3010.36926                 | 693.983354                   | 23.0530973            |
| <i>Ano1</i>         | 0.010858335               | 12           | 583.676612                 | 202.293225                   | 34.6584429            |
| <i>Kcnd3</i>        | 0.010858335               | 16           | 403.795299                 | 167.09024                    | 41.379937             |
| <i>Lrrc8d</i>       | 0.010858335               | 6            | 517.566232                 | 72.0127483                   | 13.9137262            |
| <i>Clcn5</i>        | 0.010858335               | 18           | 232.462621                 | 61.1671921                   | 26.3127               |
| <i>Htr3b</i>        | 0.010858335               | 4            | 16.2089256                 | 12.8053266                   | 79.0016994            |
| <i>Scn2a</i>        | 0.010858335               | 14           | 32.6497068                 | 7.18674258                   | 22.0116604            |
| <i>Kcnq1</i>        | 0.014666774               | 4            | 2756.47668                 | 447.138375                   | 16.2213734            |
| <i>Hcn2</i>         | 0.014666774               | 6            | 684.693368                 | 203.239941                   | 29.6833518            |
| <i>Mcoln1</i>       | 0.014666774               | 8            | 1251.47876                 | 124.841839                   | 9.97554602            |
| <i>Catsper2</i>     | 0.014666774               | 16           | 96.1213706                 | 23.39259                     | 24.3365131            |
| <i>Hvcn1</i>        | 0.019603809               | 8            | 276.529108                 | 111.277409                   | 40.2407578            |
| <i>Kcnq4</i>        | 0.019603809               | 8            | 239.683399                 | 41.3112389                   | 17.2357531            |
| <i>Gabrq</i>        | 0.025939829               | 16           | 49.9903126                 | 35.9389557                   | 71.8918403            |
| <i>Aqp11</i>        | 0.025939829               | 8            | 80.9381681                 | 20.5077446                   | 25.3375448            |
| <i>Kcng4</i>        | 0.025939829               | 6            | 20.3539519                 | 14.8891773                   | 73.1512848            |
| <i>Tpcn1</i>        | 0.033992784               | 6            | 3262.56803                 | 546.104855                   | 16.7384971            |
| <i>Hcn1</i>         | 0.033992784               | 18           | 892.285632                 | 335.951501                   | 37.650668             |
| <i>Grin3a</i>       | 0.033992784               | 0            | 50.2483746                 | 16.381666                    | 32.6013849            |
| <i>Scn11a</i>       | 0.033992784               | 6            | 13.723683                  | 7.46721986                   | 54.4111945            |
| <i>Ryr2</i>         | 0.044132525               | 18           | 19459.0532                 | 11602.1488                   | 59.6233985            |
| <i>Aqp7</i>         | 0.044132525               | 6            | 737.956836                 | 324.97834                    | 44.037581             |
| <i>P2rx4</i>        | 0.044132525               | 8            | 1074.18249                 | 142.260159                   | 13.2435746            |
| <i>Ano8</i>         | 0.044132525               | 6            | 797.878472                 | 109.328735                   | 13.7024295            |
| <i>Kcnt2</i>        | 0.044132525               | 18           | 121.281086                 | 72.3219064                   | 59.6316446            |
| <i>Asic1</i>        | 0.044132525               | 4            | 118.855961                 | 42.9155281                   | 36.1071736            |
| <i>P2rx7</i>        | 0.044132525               | 10           | 349.75942                  | 38.3437142                   | 10.9628825            |
| <i>Trpm3</i>        | 0.044132525               | 18           | 55.8486287                 | 20.3649196                   | 36.4644936            |
| <i>Cngb1</i>        | 0.044132525               | 12           | 14.0474485                 | 4.6673315                    | 33.2254751            |
| <i>Ryr3</i>         | 0.056784681               | 18           | 845.38585                  | 398.979562                   | 47.1949656            |
| <i>Cacnb3</i>       | 0.056784681               | 6            | 543.739049                 | 126.479676                   | 23.2610986            |
| <i>P2rx6</i>        | 0.056784681               | 8            | 288.902512                 | 48.3467023                   | 16.7346078            |
| <i>Kcnq2</i>        | 0.056784681               | 6            | 85.3520184                 | 45.5947391                   | 53.4196378            |
| <i>Grin1</i>        | 0.056784681               | 6            | 39.7141108                 | 26.1953568                   | 65.9598221            |
| <i>Kcnn4</i>        | 0.056784681               | 6            | 116.577635                 | 24.1952112                   | 20.7545909            |
| <i>Cacna1i</i>      | 0.056784681               | 8            | 35.1671637                 | 17.9833595                   | 51.1367924            |
| <i>Hcn4</i>         | 0.072433859               | 4            | 6209.67453                 | 1082.61717                   | 17.4343625            |
| <i>Kcnj8</i>        | 0.072433859               | 4            | 1105.26809                 | 369.399847                   | 33.4217418            |
| <i>Itpr3</i>        | 0.072433859               | 10           | 645.673555                 | 97.4861608                   | 15.0983667            |
| <i>Gjc1</i>         | 0.072433859               | 20           | 487.621507                 | 57.4608828                   | 11.7839107            |
| <i>Kcnk5</i>        | 0.072433859               | 8            | 120.524629                 | 20.7399551                   | 17.2080638            |

Table S1 continued.

| Ion channel subunit | Permutation-based P value | Lag time (h) | Average (normalised reads) | Amplitude (normalised reads) | Amplitude/average (%) |
|---------------------|---------------------------|--------------|----------------------------|------------------------------|-----------------------|
| <i>Cngb3</i>        | 0.072433859               | 18           | 18.9086894                 | 9.02480604                   | 47.728353             |
| <i>P2rx1</i>        | 0.072433859               | 6            | 22.0101819                 | 6.7455155                    | 30.6472501            |
| <i>Gja1</i>         | 0.091625931               | 18           | 5730.61422                 | 808.01373                    | 14.0999498            |
| <i>Lrrc8c</i>       | 0.091625931               | 20           | 1128.98104                 | 144.034749                   | 12.7579423            |
| <i>Chrna3</i>       | 0.091625931               | 6            | 178.743862                 | 94.3173772                   | 52.7667782            |
| <i>Kcnd2</i>        | 0.091625931               | 16           | 186.851001                 | 71.1560635                   | 38.0817138            |
| <i>Kcnh6</i>        | 0.091625931               | 4            | 36.9189438                 | 8.32876524                   | 22.5595978            |
| <i>Chrna2</i>       | 0.091625931               | 12           | 34.0616854                 | 8.16032311                   | 23.9574848            |
| <i>P2rx2</i>        | 0.091625931               | 6            | 16.5936113                 | 8.01746226                   | 48.3165607            |
| <i>Kcnq5</i>        | 0.091625931               | 8            | 11.1749507                 | 7.9562229                    | 71.1969393            |
| <i>Trpv1</i>        | 0.091625931               | 8            | 19.8104268                 | 7.93845843                   | 40.0721222            |
| <i>Ano3</i>         | 0.091625931               | 18           | 18.7785957                 | 7.68352044                   | 40.9163739            |
| <i>Asic3</i>        | 0.091625931               | 12           | 10.4954123                 | 3.60430182                   | 34.3416886            |
| <i>Vdac2</i>        | 0.114969165               | 2            | 12331.1939                 | 1128.33467                   | 9.15024675            |
| <i>Vdac3</i>        | 0.114969165               | 2            | 7155.57545                 | 802.304589                   | 11.2123               |
| <i>Gjd3</i>         | 0.114969165               | 2            | 166.281511                 | 36.0986606                   | 21.7093653            |
| <i>Hcn3</i>         | 0.114969165               | 6            | 30.9507713                 | 21.1455435                   | 68.3199243            |
| <i>Gjc2</i>         | 0.114969165               | 4            | 67.2022318                 | 20.6613075                   | 30.7449723            |
| <i>Kcnh3</i>        | 0.114969165               | 8            | 13.1419895                 | 3.75853285                   | 28.5994205            |
| <i>P2rx3</i>        | 0.114969165               | 10           | 10.4626129                 | 2.23732456                   | 21.3839945            |
| <i>Kcnh2</i>        | 0.143133982               | 6            | 6437.9481                  | 662.210543                   | 10.2860497            |
| <i>Cacna1d</i>      | 0.143133982               | 16           | 796.983817                 | 195.300633                   | 24.5049685            |
| <i>Aqp4</i>         | 0.143133982               | 14           | 73.602721                  | 27.7462302                   | 37.6972887            |
| <i>Trpc3</i>        | 0.143133982               | 20           | 138.453222                 | 24.4192184                   | 17.6371616            |
| <i>Kcnj15</i>       | 0.143133982               | 18           | 110.978682                 | 16.764589                    | 15.1061345            |
| <i>Kcnj10</i>       | 0.143133982               | 8            | 61.6340721                 | 13.3392386                   | 21.6426371            |
| <i>Trpc4</i>        | 0.143133982               | 20           | 17.6065427                 | 2.69827659                   | 15.3254198            |
| <i>Aqp5</i>         | 0.176851105               | 14           | 56.9714514                 | 26.8126787                   | 47.0633591            |
| <i>Ryr1</i>         | 0.176851105               | 8            | 33.9118918                 | 12.1987972                   | 35.9720339            |
| <i>Clic4</i>        | 0.264142705               | 20           | 13858.0979                 | 2430.49334                   | 17.5384339            |
| <i>Vdac1</i>        | 0.264142705               | 2            | 23942.5097                 | 2169.16116                   | 9.05987378            |
| <i>Cacna1c</i>      | 0.264142705               | 18           | 2396.09533                 | 987.41277                    | 41.209244             |
| <i>Scn3b</i>        | 0.264142705               | 8            | 205.123601                 | 69.672383                    | 33.966049             |
| <i>Gria1</i>        | 0.264142705               | 18           | 256.932081                 | 56.7590961                   | 22.0910896            |
| <i>Kcnf1</i>        | 0.264142705               | 22           | 67.2030078                 | 6.71929104                   | 9.99849749            |
| <i>Ano5</i>         | 0.264142705               | 20           | 23.0999282                 | 4.97075596                   | 21.518491             |
| <i>Kcnc1</i>        | 0.264142705               | 6            | 13.0219436                 | 3.78807733                   | 29.0899533            |
| <i>Kcnj12</i>       | 0.31943719                | 22           | 748.792151                 | 100.401218                   | 13.4084229            |
| <i>Gja4</i>         | 0.31943719                | 2            | 578.587147                 | 68.3790458                   | 11.8182794            |
| <i>Kcnn1</i>        | 0.31943719                | 2            | 507.382182                 | 54.4276306                   | 10.7271466            |
| <i>Gjc3</i>         | 0.31943719                | 12           | 57.7319269                 | 21.8902373                   | 37.9170391            |

**Table S1 continued.**

| <b>Ion channel subunit</b> | <b>Permutation-based P value</b> | <b>Lag time (h)</b> | <b>Average (normalised reads)</b> | <b>Amplitude (normalised reads)</b> | <b>Amplitude/average (%)</b> |
|----------------------------|----------------------------------|---------------------|-----------------------------------|-------------------------------------|------------------------------|
| <i>Gabbr2</i>              | 0.31943719                       | 22                  | 44.1876835                        | 14.0325949                          | 31.7568015                   |
| <i>Cacna1b</i>             | 0.31943719                       | 6                   | 38.7646713                        | 12.0859045                          | 31.1776266                   |
| <i>Grid2</i>               | 0.31943719                       | 20                  | 19.0837803                        | 4.47336906                          | 23.4406862                   |
| <i>Cacna1g</i>             | 0.383706374                      | 2                   | 2045.45497                        | 196.873574                          | 9.62492829                   |
| <i>Kcnn2</i>               | 0.383706374                      | 18                  | 500.430213                        | 131.225722                          | 26.2225818                   |
| <i>Kcnv2</i>               | 0.383706374                      | 16                  | 188.7664                          | 74.4915041                          | 39.4622688                   |
| <i>Trpm6</i>               | 0.383706374                      | 14                  | 22.7590724                        | 6.96443479                          | 30.600697                    |
| <i>Aqp1</i>                | 0.457886631                      | 22                  | 20524.5977                        | 1170.52535                          | 5.70303675                   |
| <i>Cacna2d3</i>            | 0.457886631                      | 18                  | 509.973019                        | 67.5280979                          | 13.241504                    |
| <i>Lrrc8b</i>              | 0.457886631                      | 16                  | 198.660302                        | 48.646344                           | 24.4871992                   |
| <i>Tpcn2</i>               | 0.457886631                      | 4                   | 313.918926                        | 20.0651656                          | 6.39183049                   |
| <i>Trpm2</i>               | 0.457886631                      | 10                  | 33.4908134                        | 11.4161806                          | 34.0874987                   |
| <i>Best1</i>               | 0.457886631                      | 18                  | 43.8842947                        | 7.7055992                           | 17.5588995                   |
| <i>Kcnd1</i>               | 0.457886631                      | 4                   | 77.4848784                        | 7.67252839                          | 9.90196868                   |
| <i>Scn3a</i>               | 0.457886631                      | 14                  | 26.4101501                        | 4.34904987                          | 16.4673425                   |
| <i>Mcoln3</i>              | 0.457886631                      | 16                  | 16.5825514                        | 1.93011671                          | 11.6394436                   |
| <i>Trpm4</i>               | 0.54292154                       | 6                   | 1010.03007                        | 107.412946                          | 10.6346285                   |
| <i>Clcn6</i>               | 0.54292154                       | 4                   | 729.01663                         | 64.3620397                          | 8.82861064                   |
| <i>P2rx5</i>               | 0.54292154                       | 0                   | 806.932865                        | 62.5326797                          | 7.74942779                   |
| <i>Trpv4</i>               | 0.54292154                       | 22                  | 350.167259                        | 49.2215341                          | 14.0565781                   |
| <i>Kcnh1</i>               | 0.54292154                       | 6                   | 30.759413                         | 4.79844601                          | 15.5999271                   |
| <i>Grin3b</i>              | 0.54292154                       | 6                   | 10.9549911                        | 4.13407391                          | 37.7368989                   |
| <i>Gjb4</i>                | 0.54292154                       | 18                  | 11.0652114                        | 4.09265507                          | 36.9866867                   |
| <i>Gria4</i>               | 0.639745804                      | 18                  | 50.1908065                        | 19.7797125                          | 39.4090351                   |
| <i>Kcnn3</i>               | 0.639745804                      | 16                  | 60.99426                          | 9.7177689                           | 15.9322679                   |
| <i>Kcnq3</i>               | 0.639745804                      | 6                   | 26.6753457                        | 7.0765448                           | 26.5284089                   |
| <i>Kcnk1</i>               | 0.639745804                      | 14                  | 22.4385464                        | 6.68241057                          | 29.7809424                   |
| <i>Kcnk2</i>               | 0.639745804                      | 12                  | 41.6979868                        | 4.33203076                          | 10.3890645                   |
| <i>Cacna1h</i>             | 0.749267486                      | 10                  | 7326.58411                        | 867.097188                          | 11.8349448                   |
| <i>Kcnj11</i>              | 0.749267486                      | 4                   | 4204.7991                         | 335.973893                          | 7.9902484                    |
| <i>Clcn1</i>               | 0.749267486                      | 16                  | 546.914641                        | 86.3647043                          | 15.7912584                   |
| <i>Gja3</i>                | 0.749267486                      | 0                   | 625.132558                        | 75.3682303                          | 12.0563598                   |
| <i>Ano6</i>                | 0.749267486                      | 18                  | 1420.06673                        | 72.0210559                          | 5.07166703                   |
| <i>Best3</i>               | 0.749267486                      | 20                  | 139.163866                        | 49.2177886                          | 35.3667873                   |
| <i>Nalcn</i>               | 0.749267486                      | 14                  | 68.673427                         | 11.638228                           | 16.9472072                   |
| <i>Kcnc2</i>               | 0.749267486                      | 18                  | 43.6528761                        | 8.48104433                          | 19.4283747                   |
| <i>Kcna2</i>               | 0.749267486                      | 16                  | 365.442679                        | 8.17725548                          | 2.23763013                   |
| <i>Clic6</i>               | 0.749267486                      | 14                  | 110.475663                        | 7.51614309                          | 6.80343789                   |
| <i>Kcng1</i>               | 0.749267486                      | 14                  | 11.1410934                        | 2.33768194                          | 20.9825182                   |
| <i>Lrrc8a</i>              | 0.872348835                      | 0                   | 1022.14626                        | 178.917348                          | 17.5040848                   |
| <i>Scn2b</i>               | 0.872348835                      | 6                   | 142.580574                        | 22.3122321                          | 15.6488584                   |



Table S1 continued.

| Ion channel subunit | Permutation-based P value | Lag time (h) | Average (normalised reads) | Amplitude (normalised reads) | Amplitude/average (%) |
|---------------------|---------------------------|--------------|----------------------------|------------------------------|-----------------------|
| <i>Cacna1e</i>      | 0.872348835               | 12           | 23.4307286                 | 4.9329317                    | 21.0532578            |
| <i>Gjb2</i>         | 0.872348835               | 10           | 11.8248421                 | 1.71321989                   | 14.4883109            |
| <i>Scn5a</i>        | 1                         | 18           | 7499.60525                 | 885.089568                   | 11.8018154            |
| <i>Kcnj5</i>        | 1                         | 18           | 10446.2695                 | 870.15038                    | 8.32977149            |
| <i>Scn1b</i>        | 1                         | 10           | 1821.10032                 | 211.071512                   | 11.5903286            |
| <i>Scn4b</i>        | 1                         | 10           | 1290.91676                 | 197.814206                   | 15.3235447            |
| <i>Scn4a</i>        | 1                         | 10           | 722.612772                 | 145.232402                   | 20.0982334            |
| <i>Cacna2d2</i>     | 1                         | 12           | 4807.1002                  | 144.791814                   | 3.01204069            |
| <i>Kcnb1</i>        | 1                         | 18           | 1502.30722                 | 80.3255725                   | 5.34681398            |
| <i>Kcna5</i>        | 1                         | 0            | 625.899018                 | 62.7421168                   | 10.0243194            |
| <i>Clcn7</i>        | 1                         | 0            | 1612.02752                 | 53.8511177                   | 3.34058303            |
| <i>Kcnk6</i>        | 1                         | 18           | 264.037362                 | 48.7519754                   | 18.4640443            |
| <i>Pkd2l2</i>       | 1                         | 18           | 355.403822                 | 35.2662645                   | 9.92287149            |
| <i>Cacna1a</i>      | 1                         | 18           | 326.887238                 | 32.5289693                   | 9.95112854            |
| <i>Scn10a</i>       | 1                         | 10           | 178.614772                 | 29.8497948                   | 16.7118287            |
| <i>Gjb5</i>         | 1                         | 22           | 117.698185                 | 28.5640146                   | 24.2688658            |
| <i>Kcna1</i>        | 1                         | 12           | 137.986886                 | 15.6424071                   | 11.3361548            |
| <i>Grin2c</i>       | 1                         | 0            | 94.9232225                 | 14.6001722                   | 15.381033             |
| <i>Kcnc3</i>        | 1                         | 0            | 81.2956026                 | 14.1100696                   | 17.356498             |
| <i>Grin2d</i>       | 1                         | 10           | 129.41409                  | 13.606023                    | 10.5135561            |
| <i>Kcnma1</i>       | 1                         | 10           | 29.2200565                 | 13.1006905                   | 44.834583             |
| <i>Kcnk13</i>       | 1                         | 0            | 80.5261714                 | 12.2630791                   | 15.2286876            |
| <i>Grik3</i>        | 1                         | 10           | 79.6236299                 | 10.9698043                   | 13.7770714            |
| <i>Kcna7</i>        | 1                         | 18           | 74.398852                  | 10.5646343                   | 14.1999965            |
| <i>Scn9a</i>        | 1                         | 10           | 11.8778657                 | 8.21894096                   | 69.1954359            |
| <i>Mcoln2</i>       | 1                         | 10           | 30.5209625                 | 7.37311549                   | 24.1575458            |
| <i>Kcna4</i>        | 1                         | 18           | 69.9235649                 | 7.11611795                   | 10.1769954            |
| <i>Scnn1a</i>       | 1                         | 12           | 60.3674679                 | 6.86225734                   | 11.3674759            |
| <i>Kcnj14</i>       | 1                         | 0            | 172.846081                 | 6.80042346                   | 3.93438105            |
| <i>Cacna1s</i>      | 1                         | 6            | 117.070921                 | 6.54627                      | 5.5917131             |
| <i>Glr3</i>         | 1                         | 10           | 27.7666501                 | 6.46617228                   | 23.2875491            |
| <i>Clic3</i>        | 1                         | 22           | 62.6083043                 | 5.72831047                   | 9.14944198            |
| <i>Gjb3</i>         | 1                         | 0            | 20.6566133                 | 5.32529629                   | 25.7801035            |
| <i>Kcnt1</i>        | 1                         | 18           | 77.9412926                 | 4.13760685                   | 5.30861975            |
| <i>Gabrg3</i>       | 1                         | 0            | 50.3188809                 | 3.50515048                   | 6.96587527            |
| <i>Gabrb3</i>       | 1                         | 8            | 15.2836776                 | 3.28408494                   | 21.4875308            |
| <i>Trpc6</i>        | 1                         | 10           | 11.040494                  | 3.03563552                   | 27.4954682            |
| <i>Gabbr1</i>       | 1                         | 18           | 24.5149091                 | 2.48364035                   | 10.1311424            |
| <i>Scn8a</i>        | 1                         | 12           | 14.5539555                 | 1.69617712                   | 11.6544064            |
| <i>Grik2</i>        | 1                         | 18           | 18.3558945                 | 1.61875136                   | 8.81870051            |
| <i>Cnga3</i>        | 1                         | 10           | 10.2734949                 | 1.51395115                   | 14.7364765            |

**Table S2. Day-night rhythm in transcripts related to the immune system.** The table lists the transcripts and the permutation-based P values for a significant day-night rhythm in the transcripts.

| Transcript     | Permutation-based P value |
|----------------|---------------------------|
| <i>Bmp3</i>    | 0.00411664                |
| <i>Bmp6</i>    | 0.01960381                |
| <i>Ccr2</i>    | 0.01960381                |
| <i>Cd163</i>   | 0.01466677                |
| <i>Cd1d1</i>   | 0.00202616                |
| <i>Cd3g</i>    | 0.04413253                |
| <i>Cklf</i>    | 0.01466677                |
| <i>Cmtm3</i>   | 0.00575569                |
| <i>Cmtm5</i>   | 0.02593983                |
| <i>Ctf1</i>    | 0.00575569                |
| <i>Cx3cl1</i>  | 0.01960381                |
| <i>Cybb</i>    | 0.00041183                |
| <i>Fgf2</i>    | 0.00062833                |
| <i>Foxp3</i>   | 0.02593983                |
| <i>Gdf5</i>    | 0.03399278                |
| <i>Gpi1</i>    | 0.00026516                |
| <i>Grn</i>     | 0.01960381                |
| <i>Hmgb1</i>   | 0.00016749                |
| <i>Il13ra1</i> | 0.00795104                |
| <i>Il1rap</i>  | 0.00795104                |
| <i>Il33</i>    | 0.00062833                |
| <i>Il7</i>     | 0.00026516                |
| <i>Ildr2</i>   | 0.03399278                |

| Transcript       | Permutation-based P value |
|------------------|---------------------------|
| <i>Inhba</i>     | 0.03399278                |
| <i>Kitl</i>      | 0.00041183                |
| <i>Lif</i>       | 0.00094274                |
| <i>Lta</i>       | 0.00170927                |
| <i>Mif</i>       | 0.00795104                |
| <i>Mmp9</i>      | 0.01466677                |
| <i>Mrc1</i>      | 0.03399278                |
| <i>Msmg</i>      | 0.00795104                |
| <i>Nampt</i>     | 0.00010365                |
| <i>Osmr</i>      | 0.00575569                |
| <i>Ptprc</i>     | 0.01085834                |
| <i>Rora</i>      | 0.00139237                |
| <i>Slurp1</i>    | 0.01085834                |
| <i>Tap2</i>      | 0.00575569                |
| <i>Thy1</i>      | 0.0000627                 |
| <i>Tnfrsf12a</i> | 0.01466677                |
| <i>Tnfrsf13b</i> | 0.01085834                |
| <i>Vegfa</i>     | 0.01466677                |
| <i>Wnt2</i>      | 0.03399278                |
| <i>Wnt2b</i>     | 0.03399278                |
| <i>Wnt5b</i>     | 0.04413253                |
| <i>Wnt9b</i>     | 0.02593983                |

**Table S3. GWAS-identified genes related to resting heart rate showing a significant day-night rhythm or a trend of one.** The table lists the genes, the permutation-based P values for a significant day-night rhythm in the genes, the GWAS source identifying the genes, and notes concerning the function of the genes.

| Gene            | Permutation-based P value | Source                                 | Notes                                                                                                           |
|-----------------|---------------------------|----------------------------------------|-----------------------------------------------------------------------------------------------------------------|
| <i>Met</i>      | 1.19E-05                  | Eppinga <i>et al.</i> <sup>4</sup>     | Receptor tyrosine kinase; PI3K is a downstream target, which is known to regulate HCN4                          |
| <i>Lzic</i>     | 0.00017                   | Eppinga <i>et al.</i> <sup>4</sup>     |                                                                                                                 |
| <i>Alg10</i>    | 0.00027                   | Eppinga <i>et al.</i> <sup>4</sup>     | Alg10b reported; modulates ether-a-go-go (EAG) K <sup>+</sup> channel                                           |
| <i>Mkln1</i>    | 0.00041                   | Eppinga <i>et al.</i> <sup>4</sup>     | Component of CTLH E3 ubiquitin-protein ligase complex                                                           |
| <i>Klhl42</i>   | 0.00041                   | Eppinga <i>et al.</i> <sup>4</sup>     | Ubiquitin-protein transferase activity                                                                          |
| <i>Gmppb</i>    | 0.00094                   | Eppinga <i>et al.</i> <sup>4</sup>     |                                                                                                                 |
| <i>Adck1</i>    | 0.00094                   | Eppinga <i>et al.</i> <sup>4</sup>     |                                                                                                                 |
| <i>Canx</i>     | 0.0014                    | Mezzavilla <i>et al.</i> <sup>5</sup>  | Calnexin; assists protein folding and quality control in the endoplasmic reticulum                              |
| <i>Capza2</i>   | 0.0014                    | Ramirez <i>et al.</i> <sup>6</sup>     |                                                                                                                 |
| <i>Ccdc141</i>  | 0.0020                    | Eppinga <i>et al.</i> <sup>4</sup>     |                                                                                                                 |
| <i>Asph</i>     | 0.0020                    | Nagy <i>et al.</i> <sup>7</sup>        |                                                                                                                 |
| <i>Slc12a9</i>  | 0.0020                    | Eijgelsheim <i>et al.</i> <sup>8</sup> | Cation-chloride cotransporter 6 (CCC6) or cation-chloride cotransporter-interacting protein 1 (CIP1)            |
| <i>Prkar2a</i>  | 0.0029                    | Eppinga <i>et al.</i> <sup>4</sup>     | cAMP-dependent protein kinase type II-alpha regulatory subunit                                                  |
| <i>Ppargc1a</i> | 0.0029                    | Eppinga <i>et al.</i> <sup>4</sup>     | Transcriptional coactivator that regulates energy metabolism genes                                              |
| <i>Tbx20</i>    | 0.0029                    | Eppinga <i>et al.</i> <sup>4</sup>     | Transcription factor                                                                                            |
| <i>Ephb4</i>    | 0.0029                    | Eppinga <i>et al.</i> <sup>4</sup>     | Receptor tyrosine kinase                                                                                        |
| <i>Tanc1</i>    | 0.0029                    | Eppinga <i>et al.</i> <sup>4</sup>     |                                                                                                                 |
| <i>Rnf220</i>   | 0.0041                    | Eppinga <i>et al.</i> <sup>4</sup>     | E3 ubiquitin-protein ligase RNF220                                                                              |
| <i>Calcr1</i>   | 0.0041                    | Eppinga <i>et al.</i> <sup>4</sup>     | Receptor for calcitonin gene-related peptide                                                                    |
| <i>Chrm2</i>    | 0.0041                    | Eppinga <i>et al.</i> <sup>4</sup>     | Muscarinic M2 receptor                                                                                          |
| <i>Arhgap10</i> | 0.0058                    | Eppinga <i>et al.</i> <sup>4</sup>     |                                                                                                                 |
| <i>Ppil1</i>    | 0.0058                    | Eppinga <i>et al.</i> <sup>4</sup>     | Protein folding                                                                                                 |
| <i>Ttn</i>      | 0.0080                    | Eppinga <i>et al.</i> <sup>4</sup>     | Titin                                                                                                           |
| <i>Fen1</i>     | 0.0080                    | Eppinga <i>et al.</i> <sup>4</sup>     |                                                                                                                 |
| <i>Fam227a</i>  | 0.0080                    | Eppinga <i>et al.</i> <sup>4</sup>     |                                                                                                                 |
| <i>Ddx17</i>    | 0.0080                    | Eppinga <i>et al.</i> <sup>4</sup>     | Implicated in translation initiation, nuclear and mitochondrial splicing, and ribosome and spliceosome assembly |
| <i>Gpatch2</i>  | 0.011                     | Eppinga <i>et al.</i> <sup>4</sup>     |                                                                                                                 |
| <i>Qrich1</i>   | 0.011                     | Eppinga <i>et al.</i> <sup>4</sup>     |                                                                                                                 |
| <i>Frm4b</i>    | 0.011                     | Eppinga <i>et al.</i> <sup>4</sup>     |                                                                                                                 |
| <i>Srrt</i>     | 0.011                     | Eppinga <i>et al.</i> <sup>4</sup>     | Plays role in RNA-mediated gene silencing by miRNAs                                                             |
| <i>Ache</i>     | 0.011                     | Eppinga <i>et al.</i> <sup>4</sup>     | Acetylcholine esterase                                                                                          |
| <i>Map3k10</i>  | 0.011                     | Eppinga <i>et al.</i> <sup>4</sup>     | Mitogen-activated protein kinase kinase kinase 10                                                               |
| <i>Cpne8</i>    | 0.011                     | Ramirez <i>et al.</i> <sup>6</sup>     |                                                                                                                 |
| <i>Srebf1</i>   | 0.011                     | Eppinga <i>et al.</i> <sup>4</sup>     | Transcription factor                                                                                            |

**Table S3 continued.**

| <b>Gene</b>     | <b>Permutation-based P value</b> | <b>Source</b>                      | <b>Notes</b>                                                                                               |
|-----------------|----------------------------------|------------------------------------|------------------------------------------------------------------------------------------------------------|
| <i>Ufsp1</i>    | 0.015                            | Eppinga <i>et al.</i> <sup>4</sup> | Protease                                                                                                   |
| <i>Pcolce</i>   | 0.015                            | Eppinga <i>et al.</i> <sup>4</sup> |                                                                                                            |
| <i>Arhgef40</i> | 0.020                            | Eppinga <i>et al.</i> <sup>4</sup> |                                                                                                            |
| <i>Flrt2</i>    | 0.020                            | Eppinga <i>et al.</i> <sup>4</sup> |                                                                                                            |
| <i>Apoc1</i>    | 0.026                            | Eppinga <i>et al.</i> <sup>4</sup> |                                                                                                            |
| <i>Cdh11</i>    | 0.034                            | Eppinga <i>et al.</i> <sup>4</sup> | Cadherin-11                                                                                                |
| <i>Apoe</i>     | 0.034                            | Eppinga <i>et al.</i> <sup>4</sup> |                                                                                                            |
| <i>Tomm22</i>   | 0.034                            | Eppinga <i>et al.</i> <sup>4</sup> |                                                                                                            |
| <i>Dsp</i>      | 0.034                            | Eppinga <i>et al.</i> <sup>4</sup> | Desmoplakin                                                                                                |
| <i>Cd46</i>     | 0.044                            | Eppinga <i>et al.</i> <sup>4</sup> |                                                                                                            |
| <i>Ip6k1</i>    | 0.044                            | Eppinga <i>et al.</i> <sup>4</sup> | Inositol hexakisphosphate kinase 1; link to AMP kinase                                                     |
| <i>Lamb2</i>    | 0.057                            | Eppinga <i>et al.</i> <sup>4</sup> |                                                                                                            |
| <i>Cby1</i>     | 0.057                            | Eppinga <i>et al.</i> <sup>4</sup> | Interacts with beta-catenin, inhibiting beta-catenin-mediated transcriptional activation                   |
| <i>Hcn4</i>     | 0.072                            | Eppinga <i>et al.</i> <sup>4</sup> | HCN4                                                                                                       |
| <i>Des</i>      | 0.092                            | Eppinga <i>et al.</i> <sup>4</sup> | Desmin                                                                                                     |
| <i>Cdc23</i>    | 0.092                            | Eppinga <i>et al.</i> <sup>4</sup> | Ubiquitin-protein transferase activity                                                                     |
| <i>Gja1</i>     | 0.092                            | Eppinga <i>et al.</i> <sup>4</sup> | Cx43                                                                                                       |
| <i>Gng11</i>    | 0.092                            | Eppinga <i>et al.</i> <sup>4</sup> | G protein subunit gamma 11                                                                                 |
| <i>Ndrp2</i>    | 0.092                            | Eppinga <i>et al.</i> <sup>4</sup> |                                                                                                            |
| <i>Gtpbp1</i>   | 0.092                            | Eppinga <i>et al.</i> <sup>4</sup> | Promotes degradation of target mRNA species and plays a role in the regulation of circadian mRNA stability |

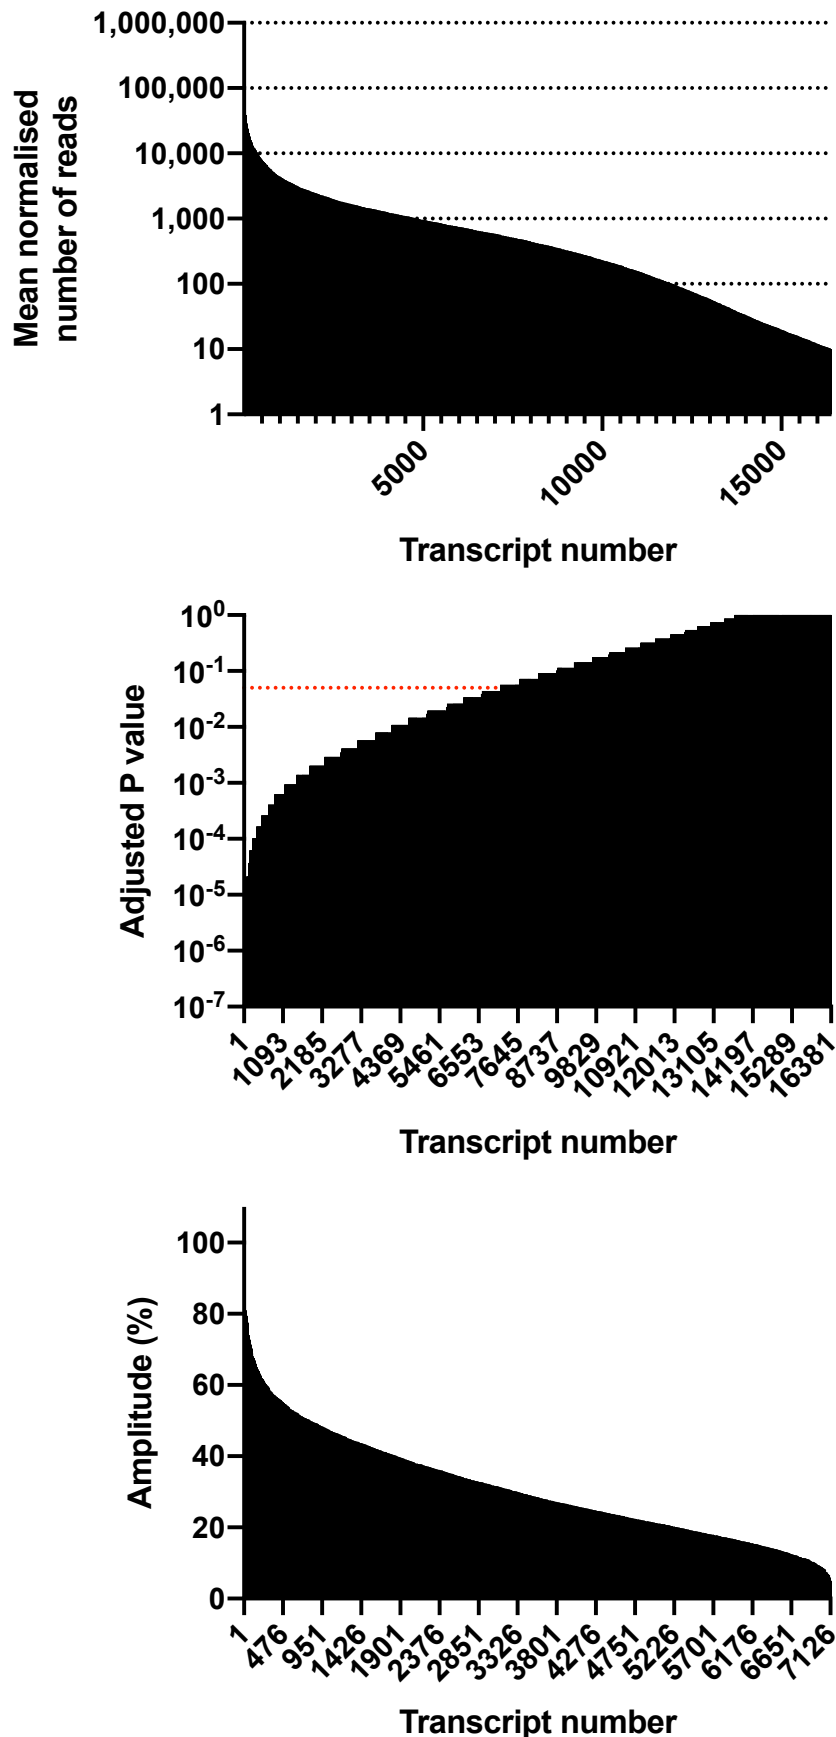

**Fig. S1. Transcriptome showing a day-night rhythm.** **A**, average expression (normalised reads or counts) over 24 h of the 16,387 most abundant transcripts. **B**, permutation-based P value from JTK Cycle for a significant day-night rhythm for the 16,387 transcripts;  $P=0.05$  is shown by a red dotted line. **C**, amplitude of the day-night rhythm (expressed as a percentage of the average expression over 24 h) for the 7,134 transcripts showing a significant day-night rhythm. In each panel, transcripts are ranked in terms of the variable shown.

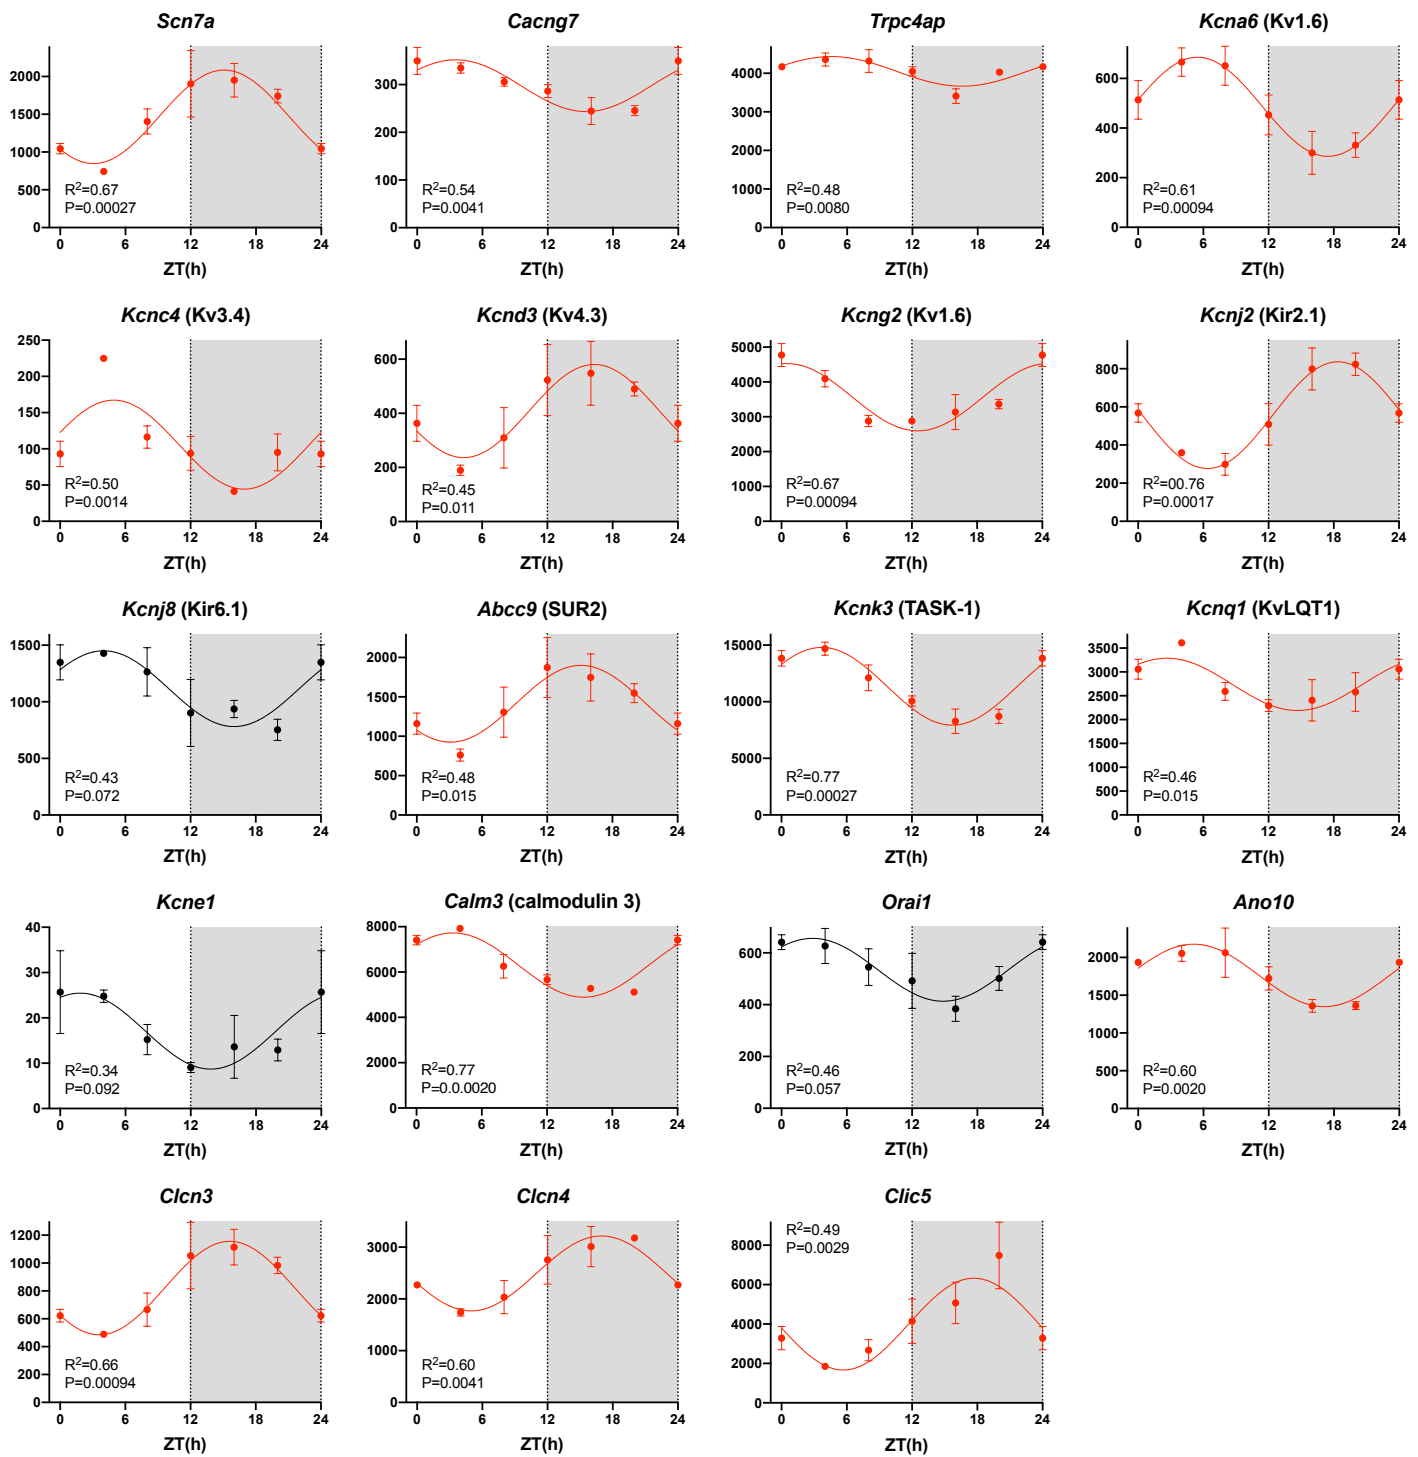

**Fig. S2. Ion channels subunits.** Abundance (normalised counts) of transcripts for ion channel subunits is shown over 24 h. *Calm3* is a regulator of *Kcnq1*<sup>9</sup>. Gene name and common name (in parenthesis) given; mean  $\pm$  SEM transcript abundance shown (n=3) at six ZT time points over 24 h (24 h data repeat of 0 h data); significant data (P<0.05) or data showing a trend towards significance (0.05<P<0.1) have been fitted with a sine wave by a least squares fitting method and the R<sup>2</sup> value is given; the permutation-based P value from JTK Cycle for significance of a day-night rhythm is given; significant data are shown in red and non-significant data are shown in black.

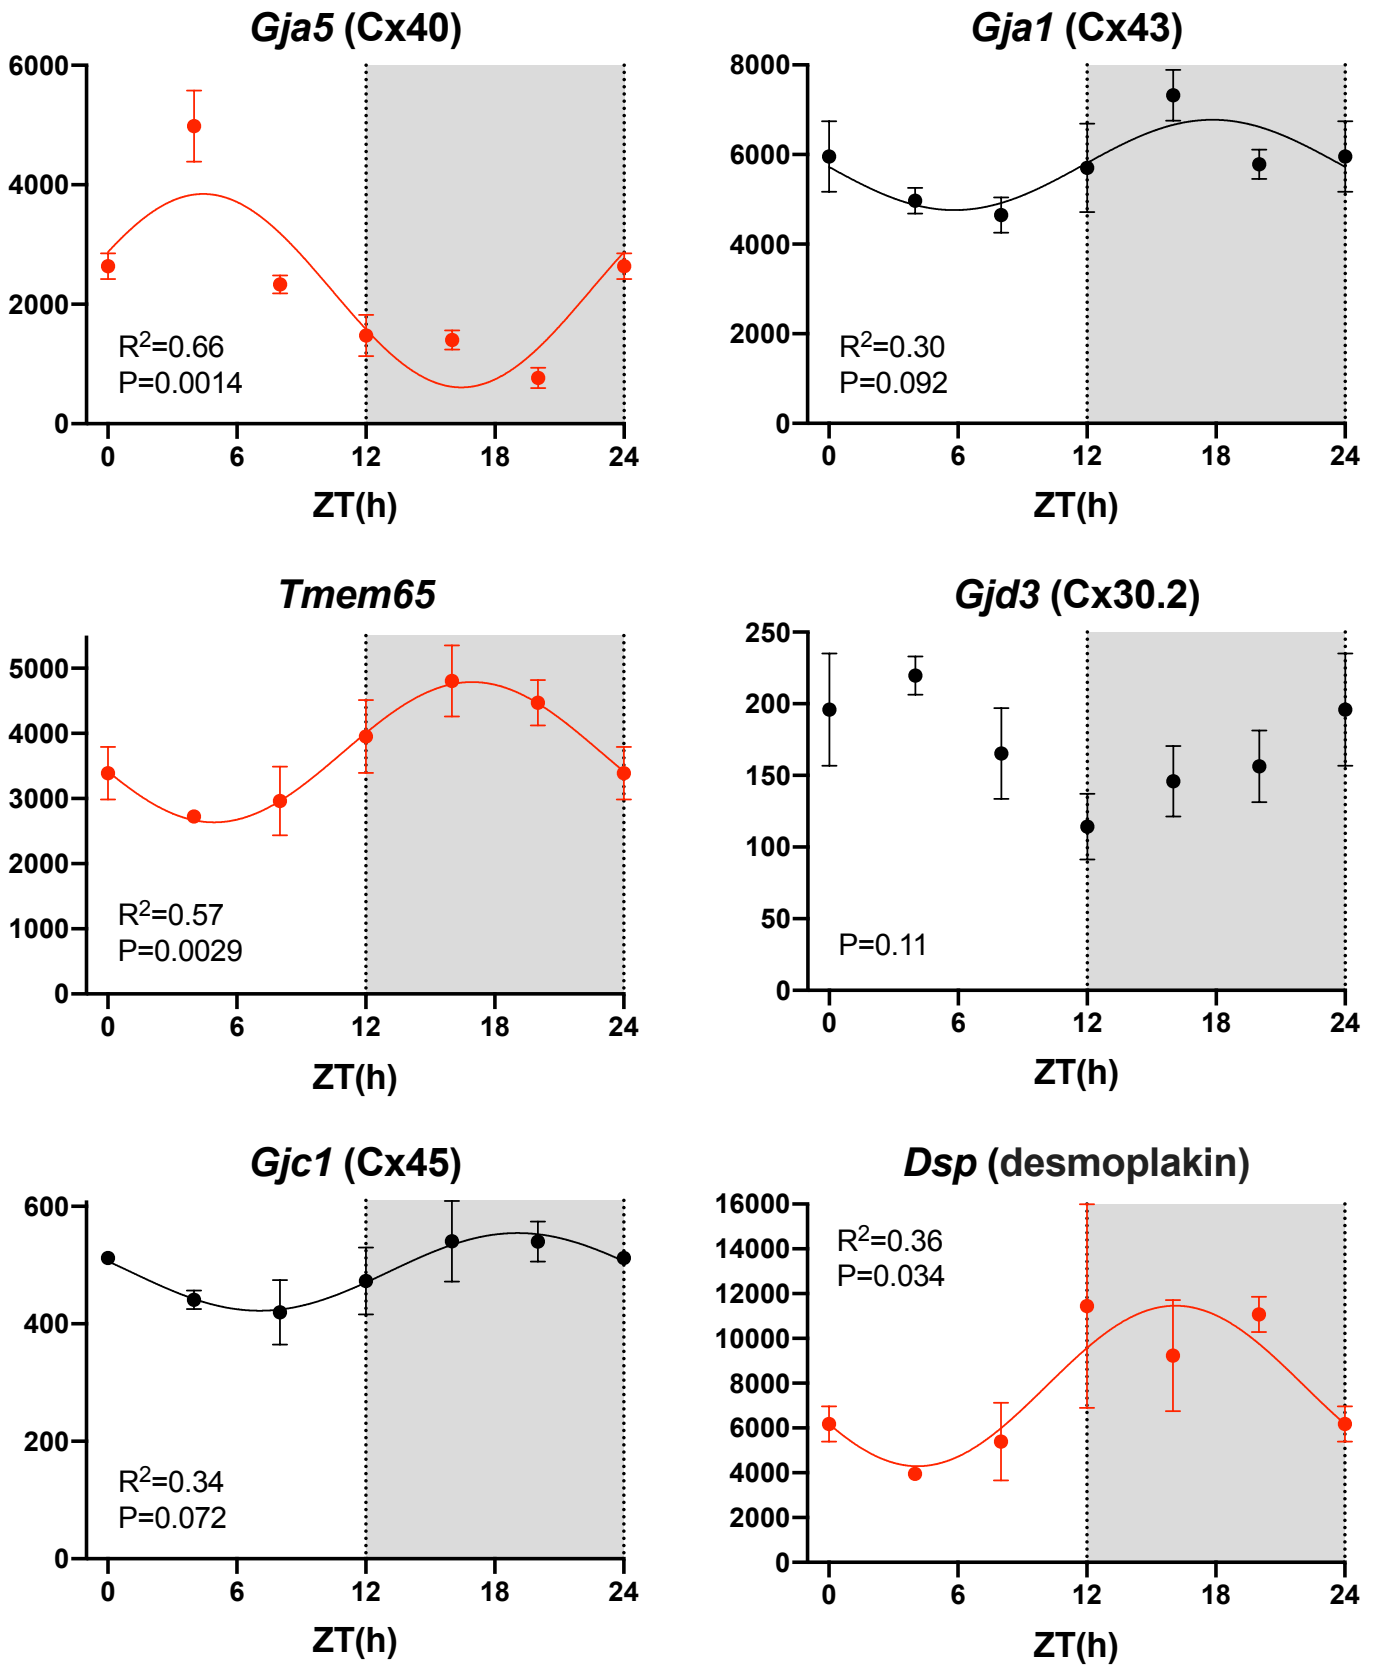

**Fig. S3. Cell-cell coupling.** Abundance (normalised counts) of gap junction and desmosome transcripts is shown over 24 h. Gene name and common name (in parenthesis) given; mean  $\pm$  SEM transcript abundance shown ( $n=3$ ) at six ZT time points over 24 h (24 h data repeat of 0 h data); significant data ( $P<0.05$ ) or data showing a trend towards significance ( $0.05<P<0.1$ ) have been fitted with a sine wave by a least squares fitting method and the  $R^2$  value is given; the permutation-based P value from JTK Cycle for significance of a day-night rhythm is given; significant data are shown in red and non-significant data are shown in black.

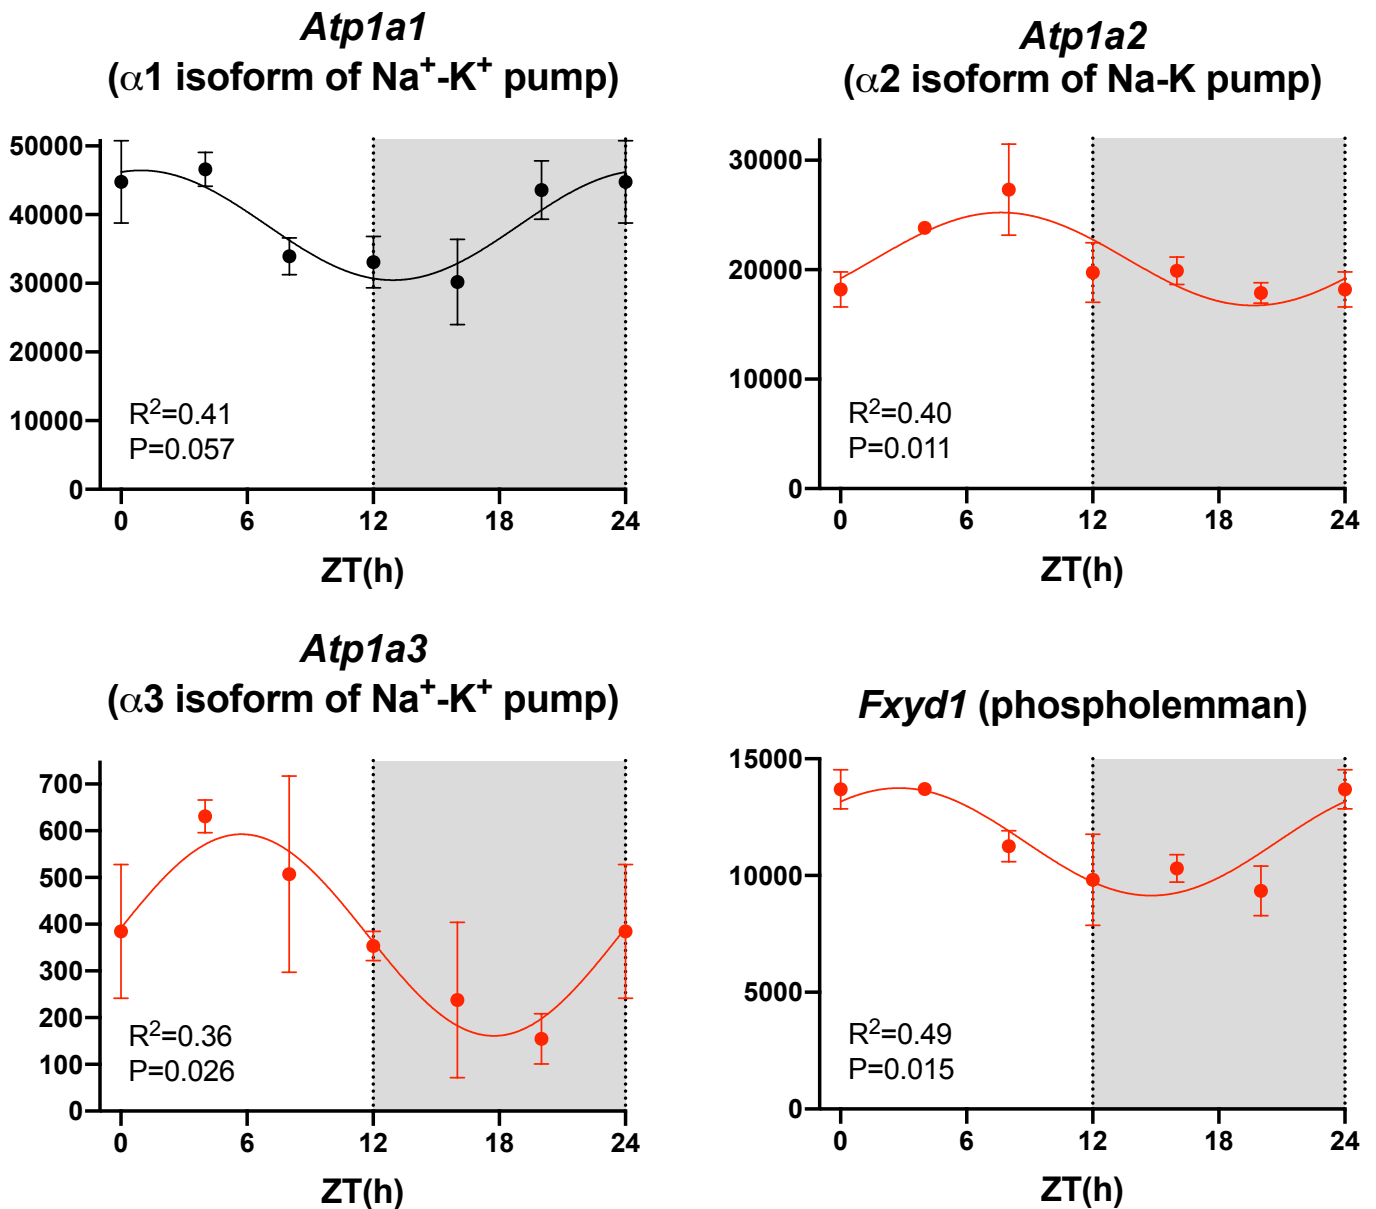

**Fig. S4.  $\text{Na}^+ \text{-K}^+$  pump subunits.** Abundance (normalised counts) of transcripts for  $\text{Na}^+ \text{-K}^+$  pump subunits and phospholemman, a regulator of the  $\text{Na}^+ \text{-K}^+$  pump<sup>10</sup>, is shown over 24 h. Gene name and common name (in parenthesis) given; mean  $\pm$  SEM transcript abundance shown ( $n=3$ ) at six ZT time points over 24 h (24 h data repeat of 0 h data); significant data ( $P < 0.05$ ) or data showing a trend towards significance ( $0.05 < P < 0.1$ ) have been fitted with a sine wave by a least squares fitting method and the  $R^2$  value is given; the permutation-based P value from JTK Cycle for significance of a day-night rhythm is given; significant data are shown in red and non-significant data are shown in black.



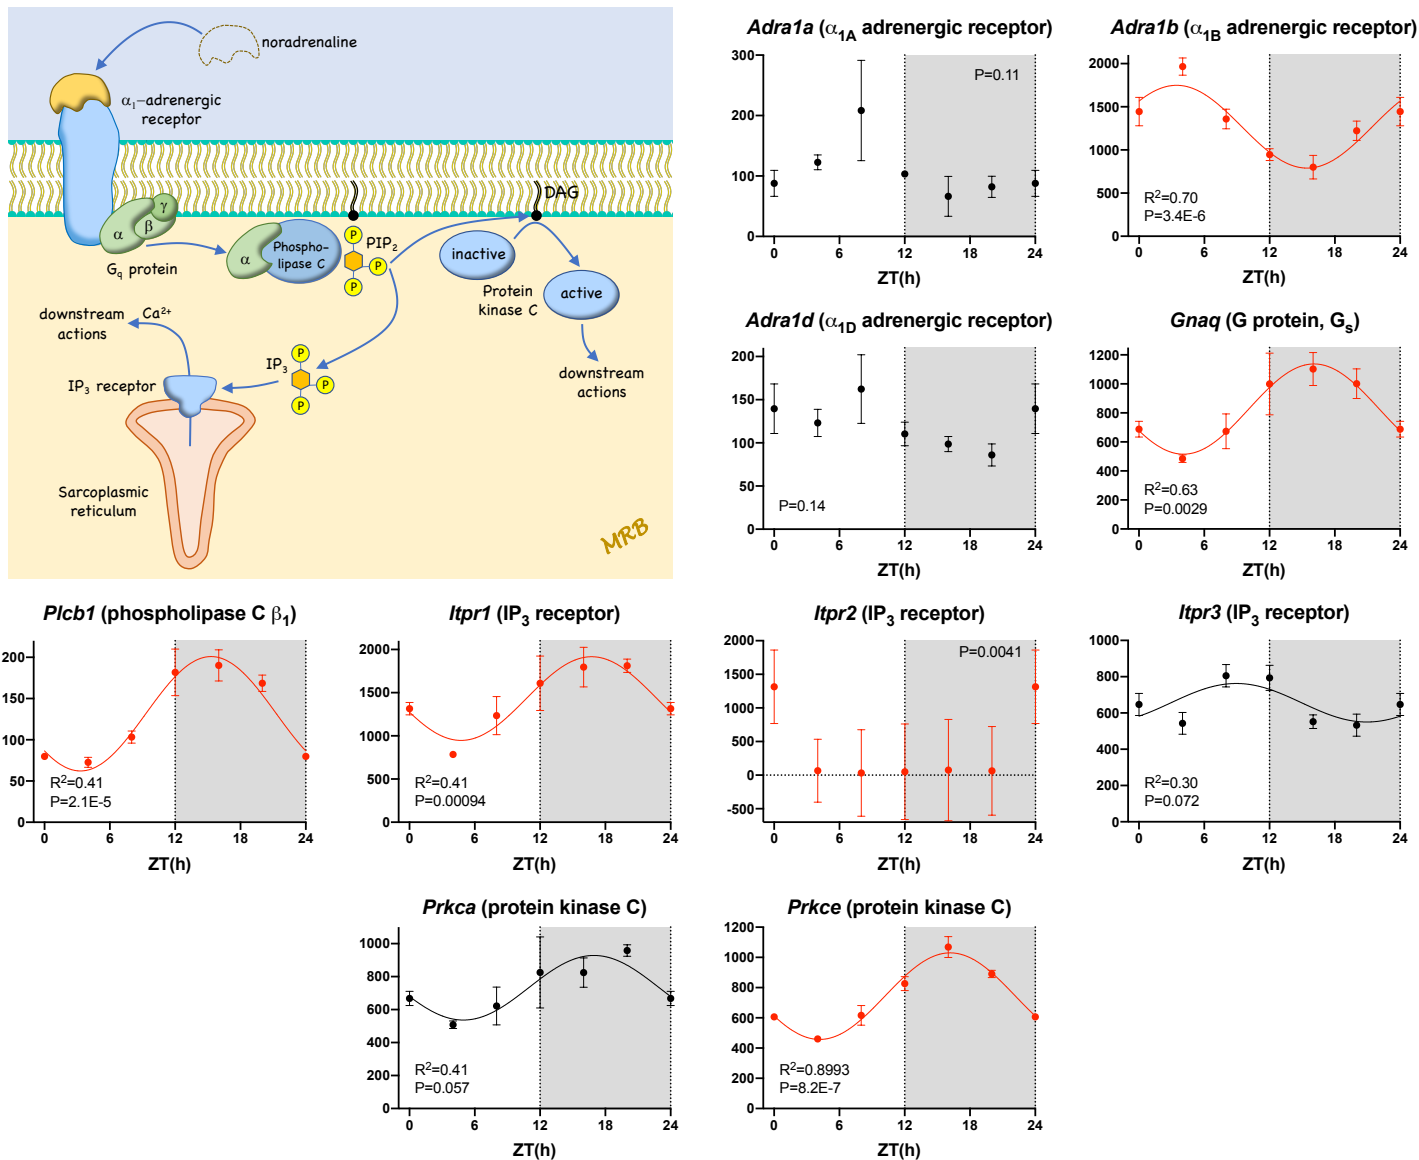

**Fig. S5.  $\alpha$ -adrenergic receptor pathway.** Abundance (normalised counts) of  $\alpha$ -adrenergic receptor pathway transcripts is shown over 24 h. Gene name and common name (in parenthesis) given; mean  $\pm$  SEM transcript abundance shown ( $n=3$ ) at six ZT time points over 24 h (24 h data repeat of 0 h data); significant data ( $P<0.05$ ) or data showing a trend towards significance ( $0.05<P<0.1$ ) have been fitted with a sine wave by a least squares fitting method and the  $R^2$  value is given; the permutation-based P value from JTK Cycle for significance of a day-night rhythm is given; significant data are shown in red and non-significant data are shown in black. The inset shows a schematic diagram of the  $\alpha$ -adrenergic receptor pathway.

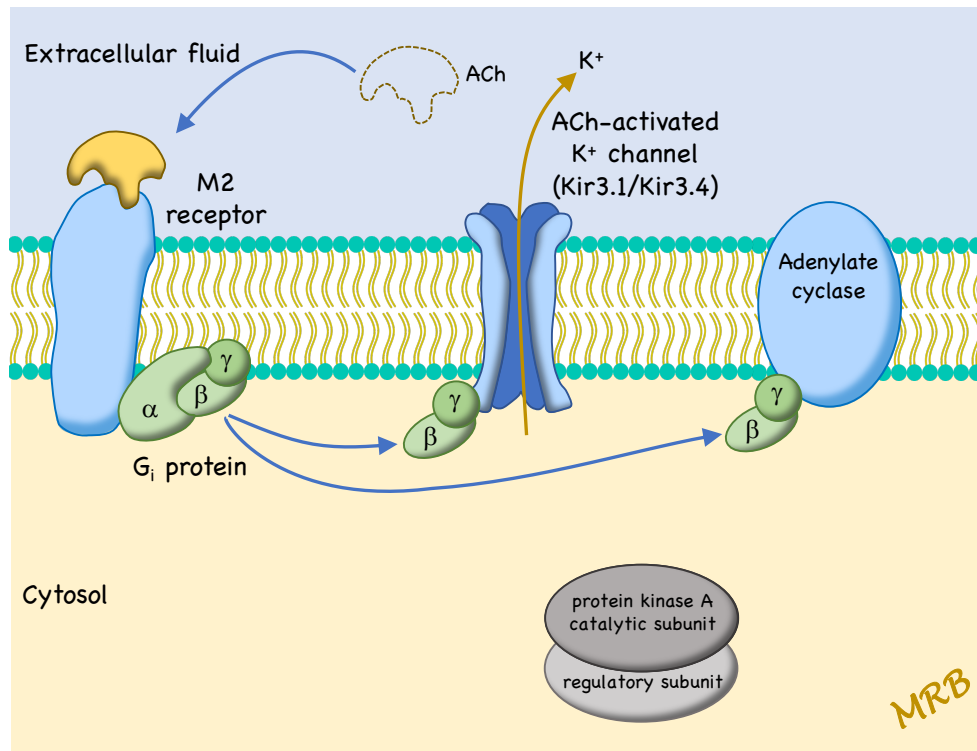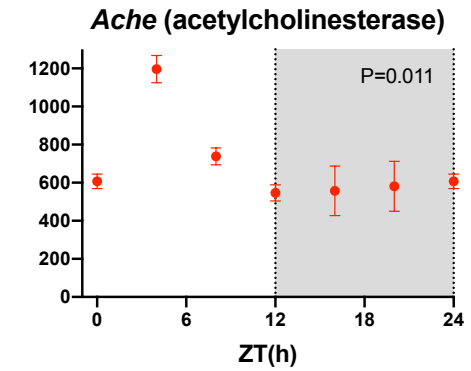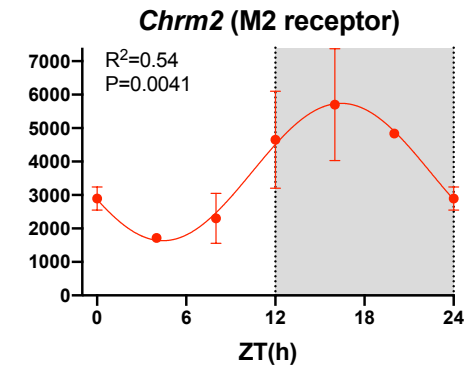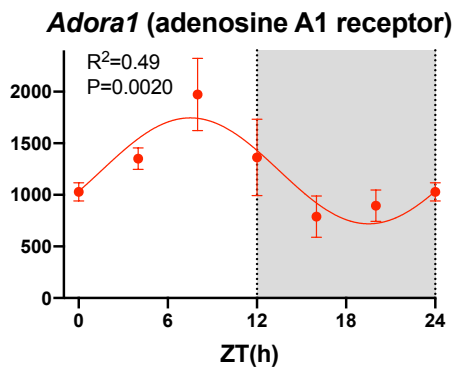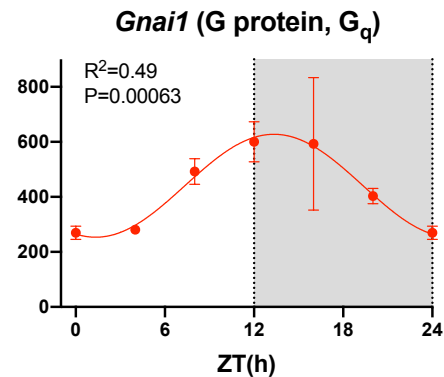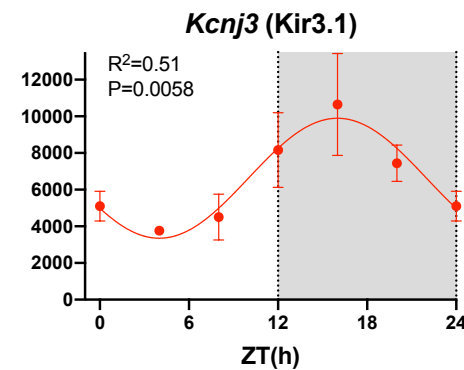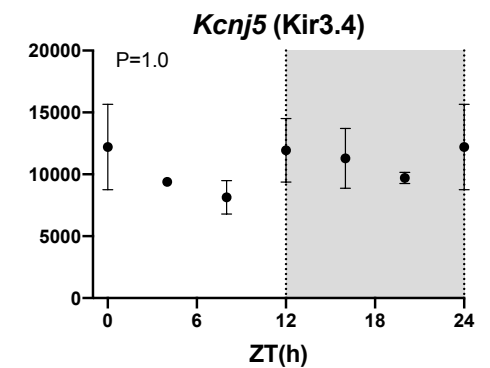

**Fig. S6. Muscarinic receptor pathway.** Abundance (normalised counts) of muscarinic receptor pathway transcripts is shown over 24 h. Gene name and common name (in parenthesis) given; mean  $\pm$  SEM transcript abundance shown ( $n=3$ ) at six ZT time points over 24 h (24 h data repeat of 0 h data); significant data ( $P<0.05$ ) or data showing a trend towards significance ( $0.05<P<0.1$ ) have been fitted with a sine wave by a least squares fitting method and the  $R^2$  value is given; the permutation-based P value from JTK Cycle for significance of a day-night rhythm is given; significant data are shown in red and non-significant data are shown in black. The inset shows a schematic diagram of the muscarinic receptor pathway.

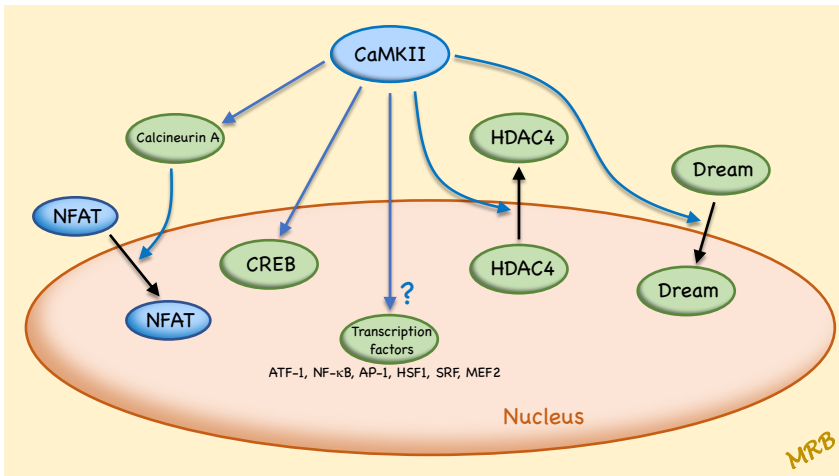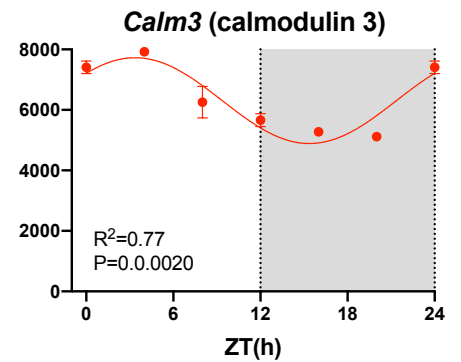

**Camk2d (Ca<sup>2+</sup>/calmodulin-dependent protein kinase II)**

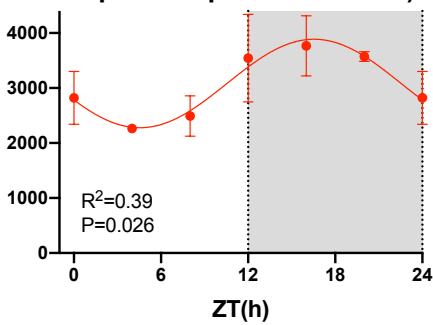

**Ppp3ca (calcineurin A)**

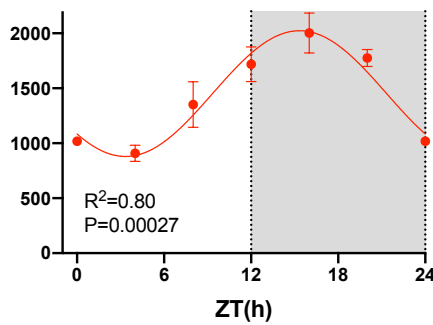

**Ppp3cb (calcineurin A)**

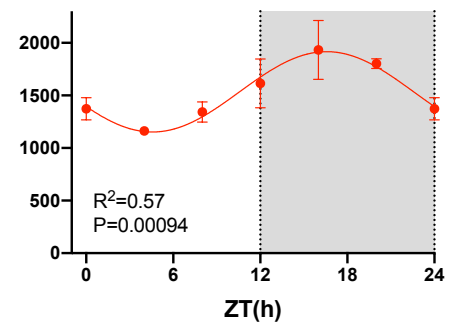

**Creb1**

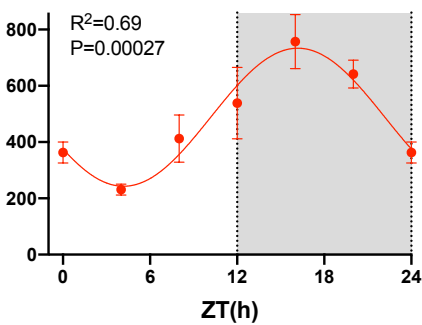

**Creb3**

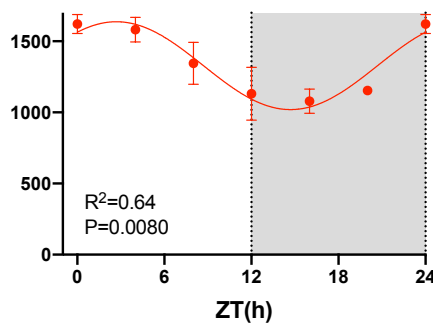

**Creb5**

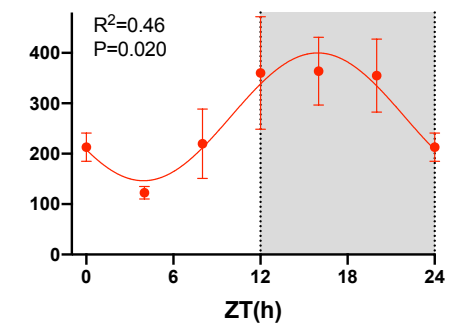

**Hdac4**

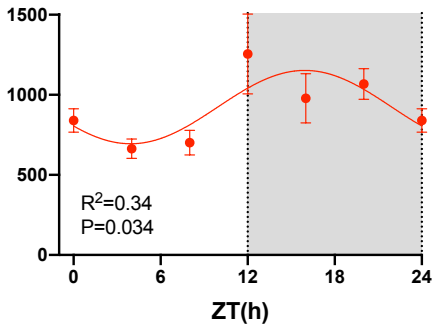

**Rbl1 (DREAM)**

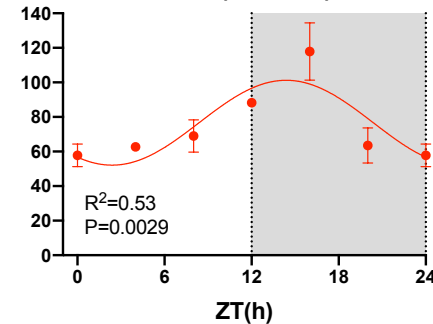

**Rbl2 (DREAM)**

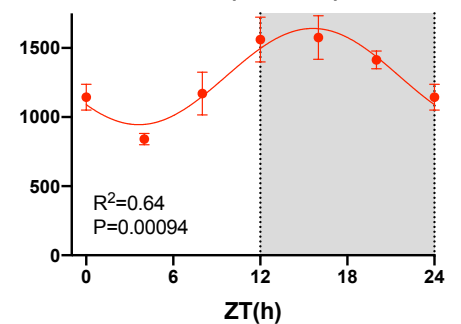

**Fig. S7. CaMKII pathway.** Abundance (normalised counts) of CaMKII pathway transcripts is shown over 24 h. Gene name and common name (in parenthesis) given; mean  $\pm$  SEM transcript abundance shown ( $n=3$ ) at six ZT time points over 24 h (24 h data repeat of 0 h data); all data are significant ( $P<0.05$ ) and have therefore been fitted with a sine wave by a least squares fitting method and the  $R^2$  value is given; the permutation-based P value from JTK Cycle for significance of a day-night rhythm is given; all data are significant and are therefore shown in red. The inset shows a schematic diagram of the CaMKII pathway (based on Kreusser and Backs<sup>11</sup>).

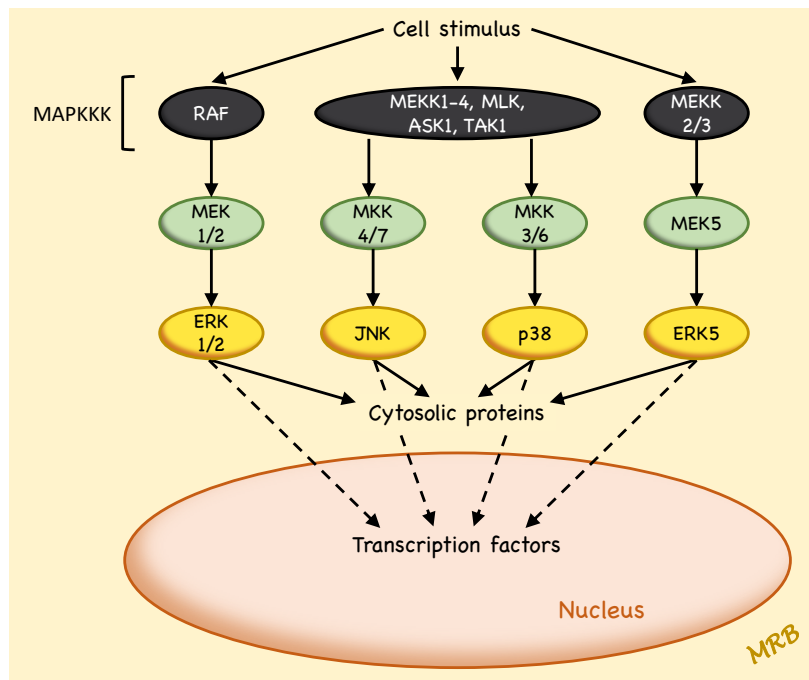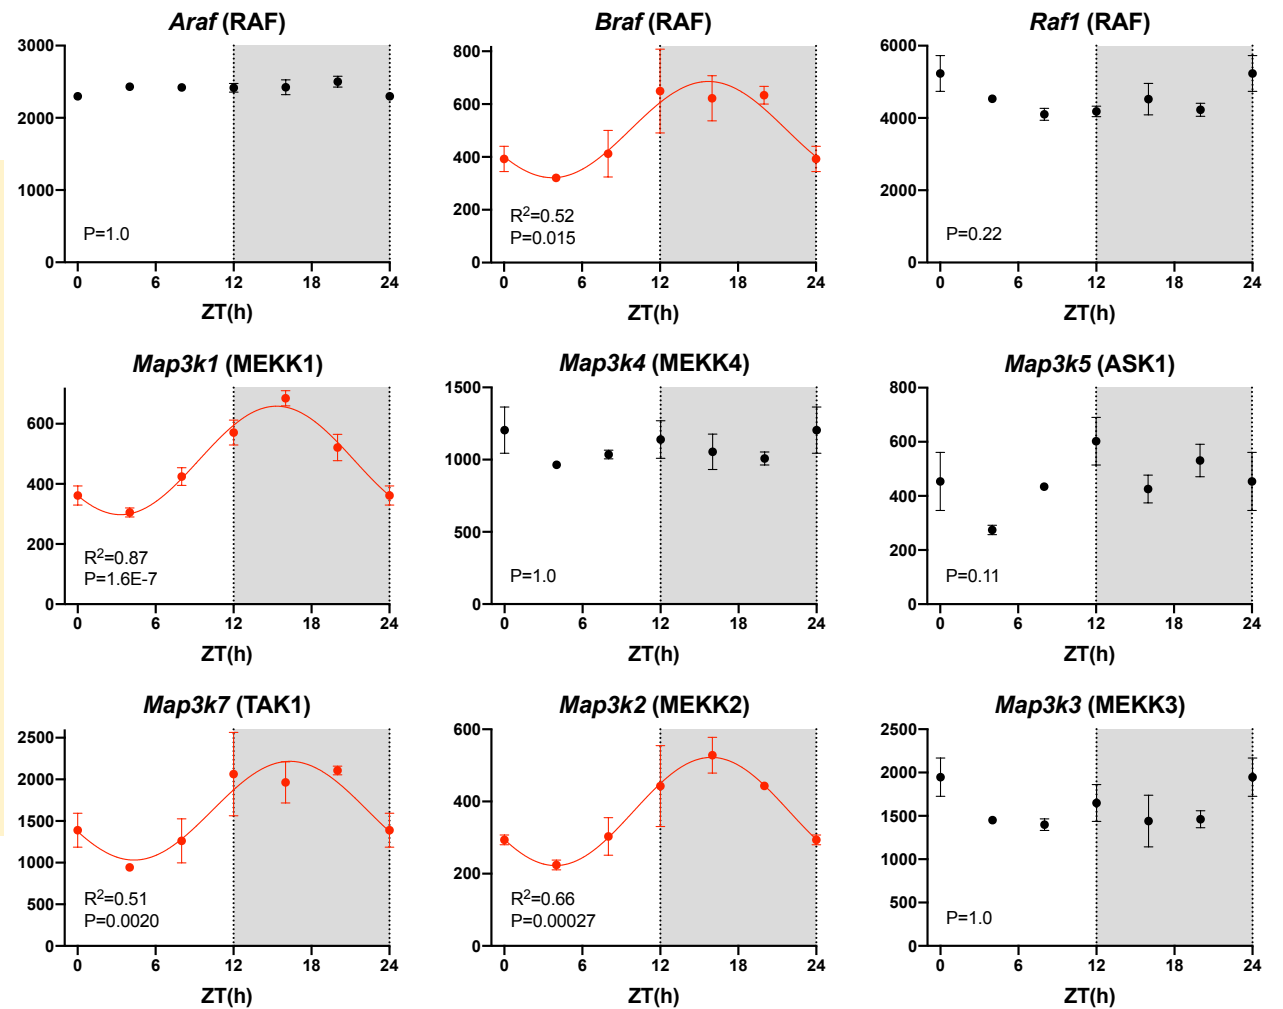

**Fig. S8. First tier of kinases in the MAP kinase pathway.** Abundance (normalised counts) of kinase transcripts is shown over 24 h. Gene name and common name (in parenthesis) given; mean  $\pm$  SEM transcript abundance shown (n=3) at six ZT time points over 24 h (24 h data repeat of 0 h data); significant data ( $P < 0.05$ ) or data showing a trend towards significance ( $0.05 < P < 0.1$ ) have been fitted with a sine wave by a least squares fitting method and the  $R^2$  value is given; the permutation-based P value from JTK Cycle for significance of a day-night rhythm is given; significant data are shown in red and non-significant data are shown in black. The inset shows a schematic diagram of the MAP kinase pathway (based on Rose *et al.*<sup>12</sup>).

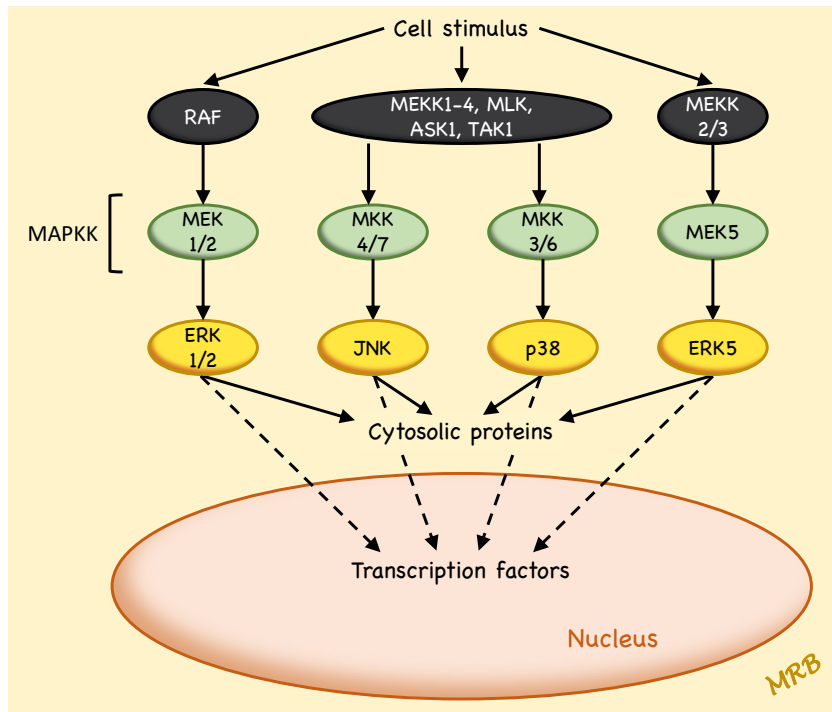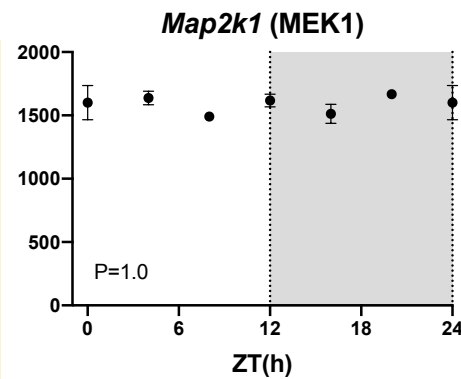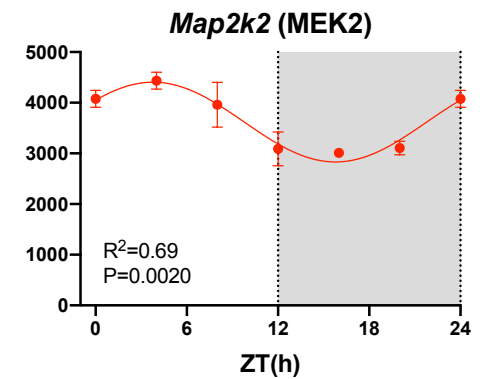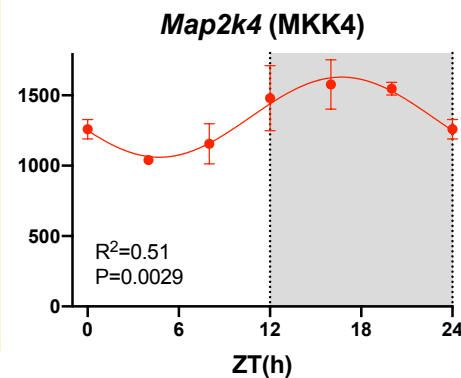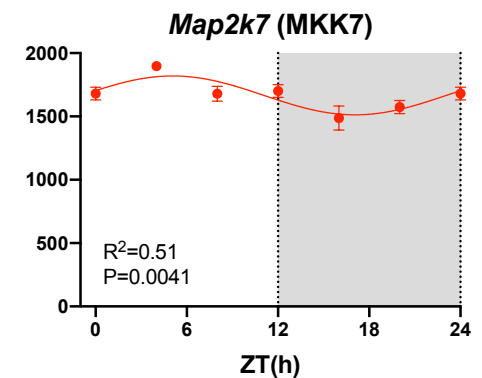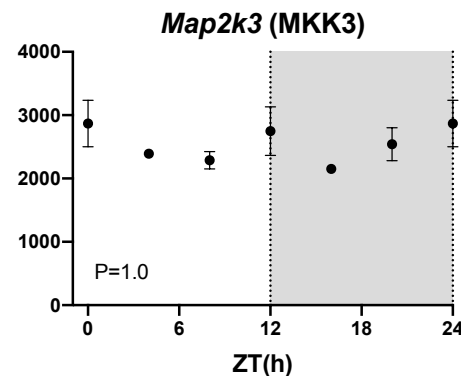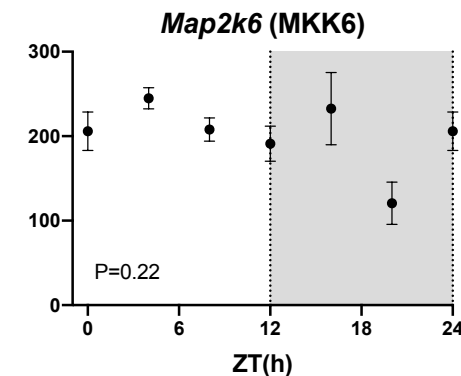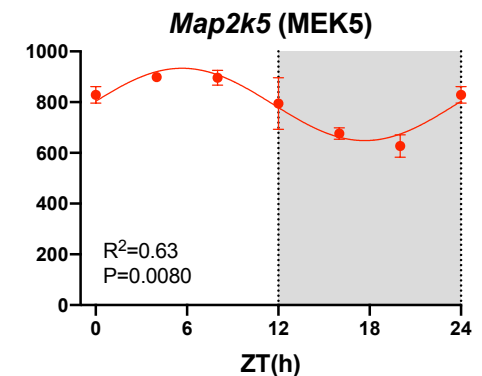

**Fig. S9. Second tier of kinases in the MAP kinase pathway.** Abundance (normalised counts) of kinase transcripts is shown over 24 h. Gene name and common name (in parenthesis) given; mean  $\pm$  SEM transcript abundance shown ( $n=3$ ) at six ZT time points over 24 h (24 h data repeat of 0 h data); significant data ( $P<0.05$ ) or data showing a trend towards significance ( $0.05<P<0.1$ ) have been fitted with a sine wave by a least squares fitting method and the  $R^2$  value is given; the permutation-based P value from JTK Cycle for significance of a day-night rhythm is given; significant data are shown in red and non-significant data are shown in black. The inset shows a schematic diagram of the MAP kinase pathway (based on Rose *et al.*<sup>12</sup>).

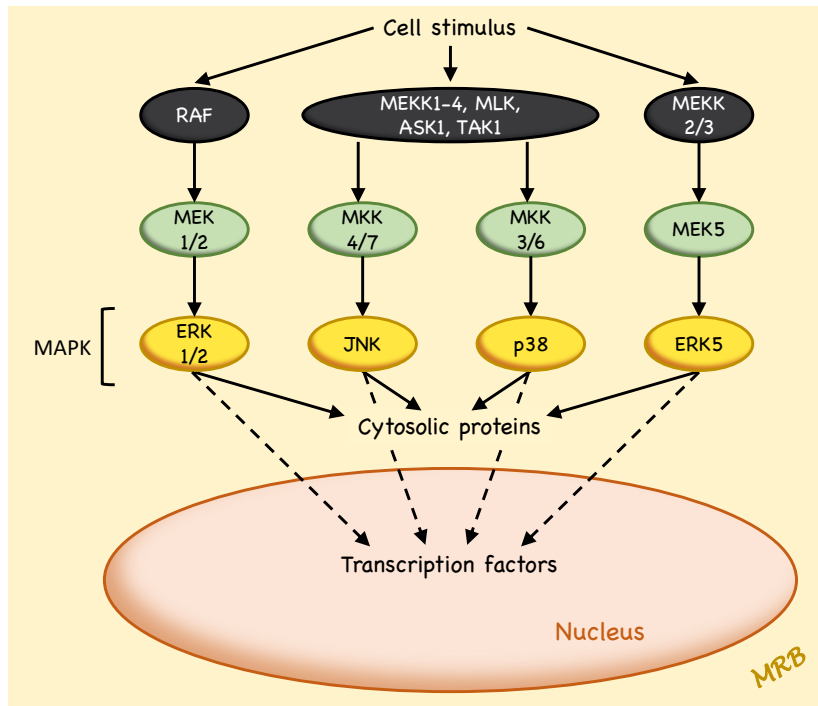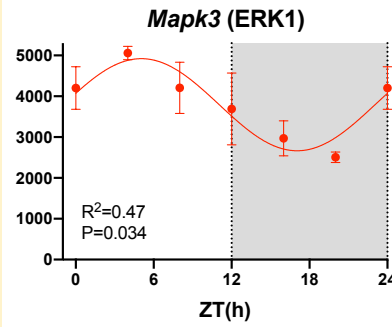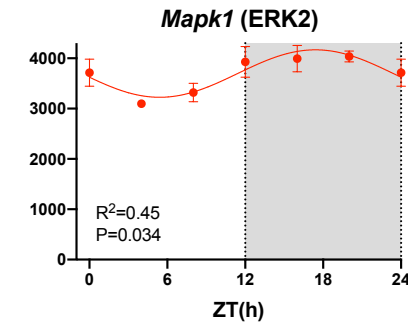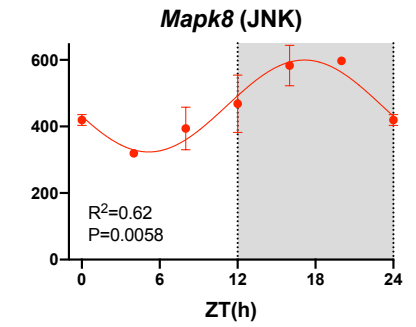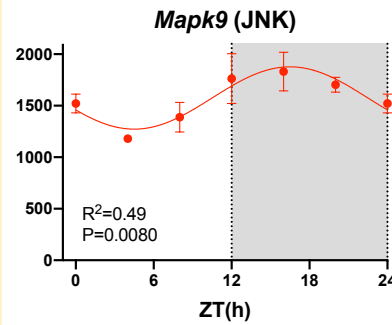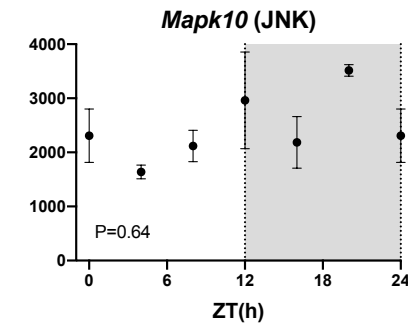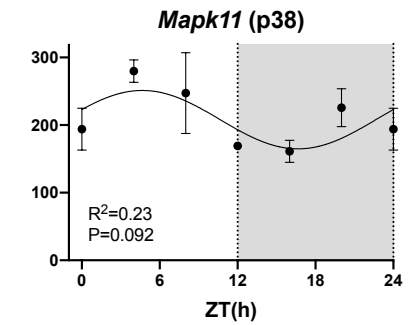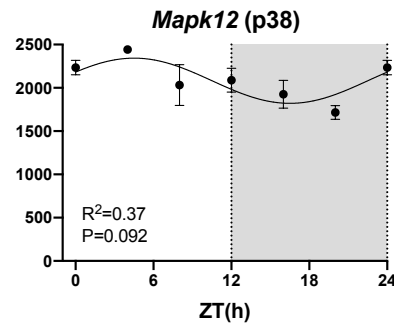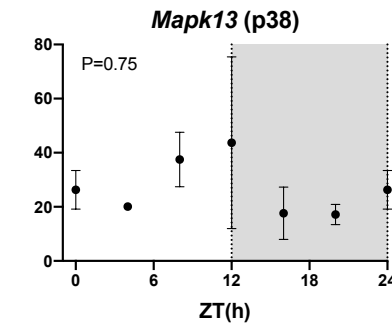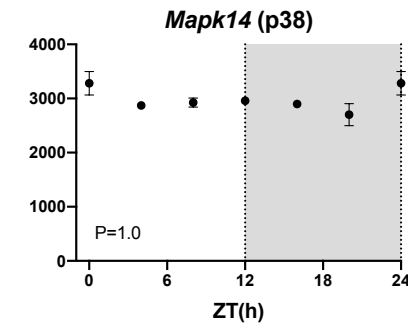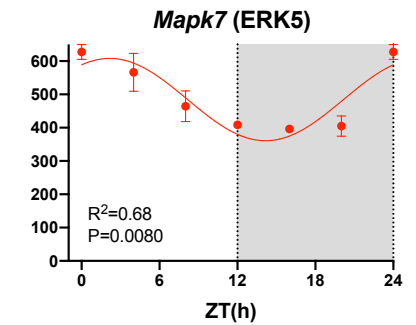

**Fig. S10. Third tier of kinases in the MAP kinase pathway.** Abundance (normalised counts) of kinase transcripts is shown over 24 h. Gene name and common name (in parenthesis) given; mean  $\pm$  SEM transcript abundance shown ( $n=3$ ) at six ZT time points over 24 h (24 h data repeat of 0 h data); significant data ( $P<0.05$ ) or data showing a trend towards significance ( $0.05<P<0.1$ ) have been fitted with a sine wave by a least squares fitting method and the  $R^2$  value is given; the permutation-based P value from JTK Cycle for significance of a day-night rhythm is given; significant data are shown in red and non-significant data are shown in black. The inset shows a schematic diagram of the MAP kinase pathway (based on Rose *et al.*<sup>12</sup>).

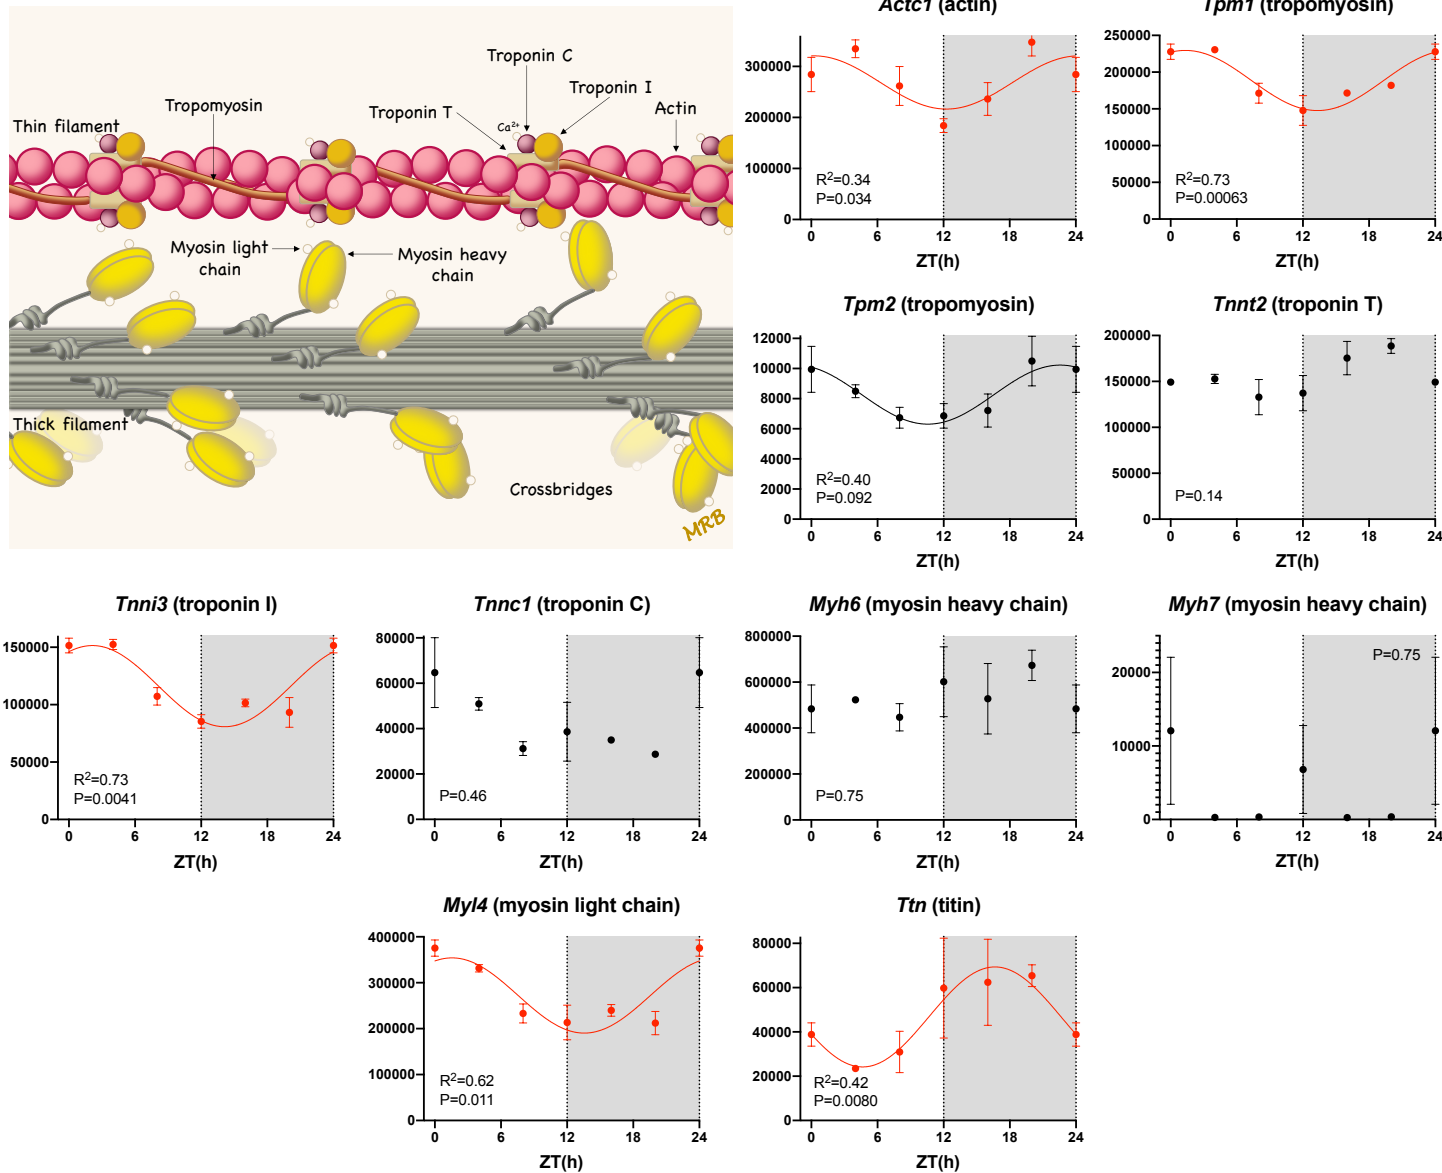

**Fig. S11. Contractile proteins.** Abundance (normalised counts) of transcripts for contractile proteins is shown over 24 h. Gene name and common name (in parenthesis) given; mean  $\pm$  SEM transcript abundance shown ( $n=3$ ) at six ZT time points over 24 h (24 h data repeat of 0 h data); significant data ( $P < 0.05$ ) or data showing a trend towards significance ( $0.05 < P < 0.1$ ) have been fitted with a sine wave by a least squares fitting method and the  $R^2$  value is given; the permutation-based P value from JTK Cycle for significance of a day-night rhythm is given; significant data are shown in red and non-significant data are shown in black. The inset shows a schematic diagram of the contractile apparatus (based on Redwood *et al.*<sup>13</sup>).

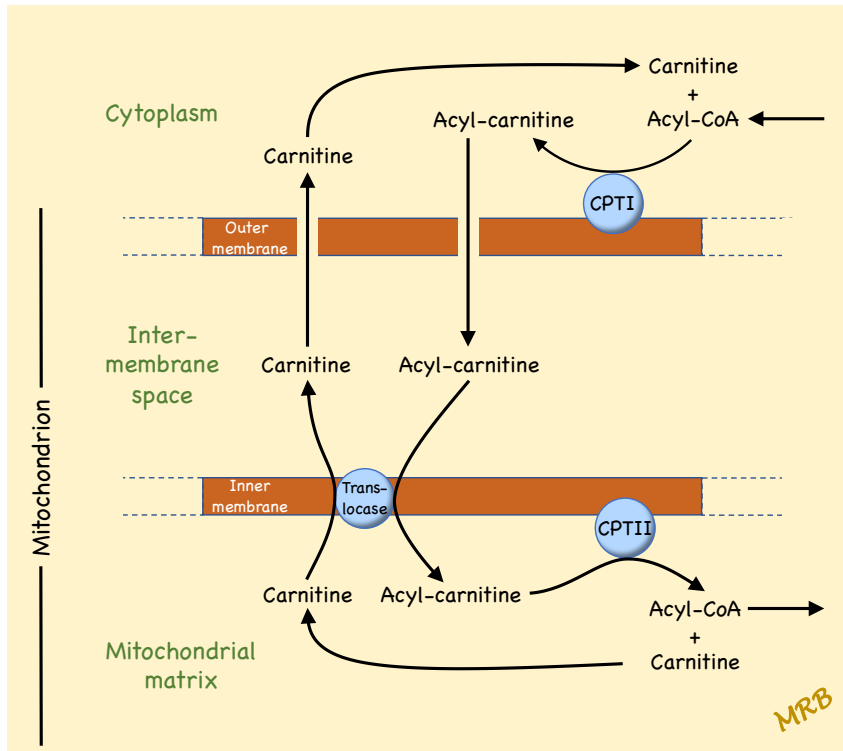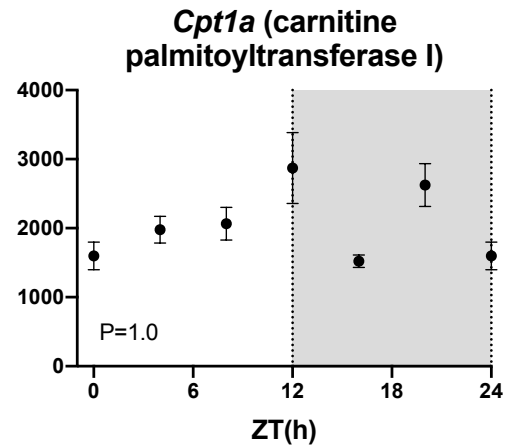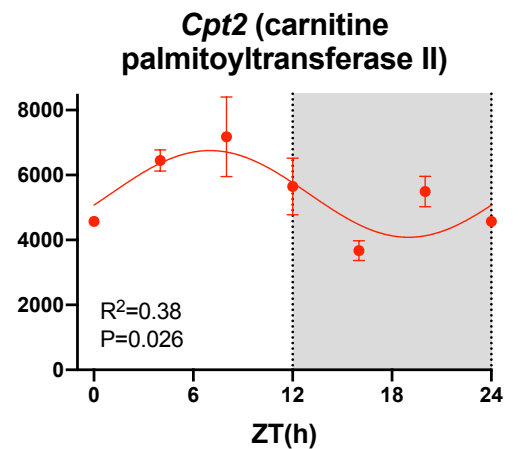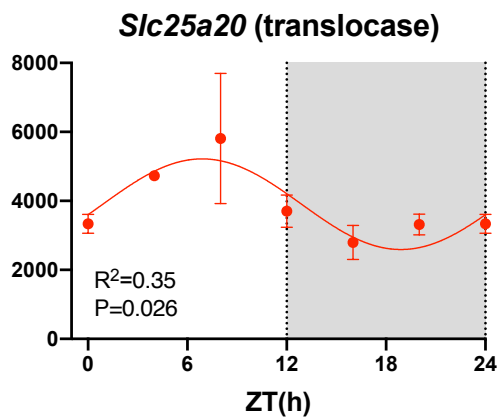

**Fig. S12. Acyl-CoA transport from the cytoplasm to the mitochondrial matrix.** Abundance (normalised counts) of acyl-CoA transport transcripts is shown over 24 h. Gene name and common name (in parenthesis) given; mean  $\pm$  SEM transcript abundance shown ( $n=3$ ) at six ZT time points over 24 h (24 h data repeat of 0 h data); significant data ( $P<0.05$ ) or data showing a trend towards significance ( $0.05<P<0.1$ ) have been fitted with a sine wave by a least squares fitting method and the  $R^2$  value is given; the permutation-based P value from JTK Cycle for significance of a day-night rhythm is given; significant data are shown in red and non-significant data are shown in black. The inset shows a schematic diagram of acyl-CoA transport.



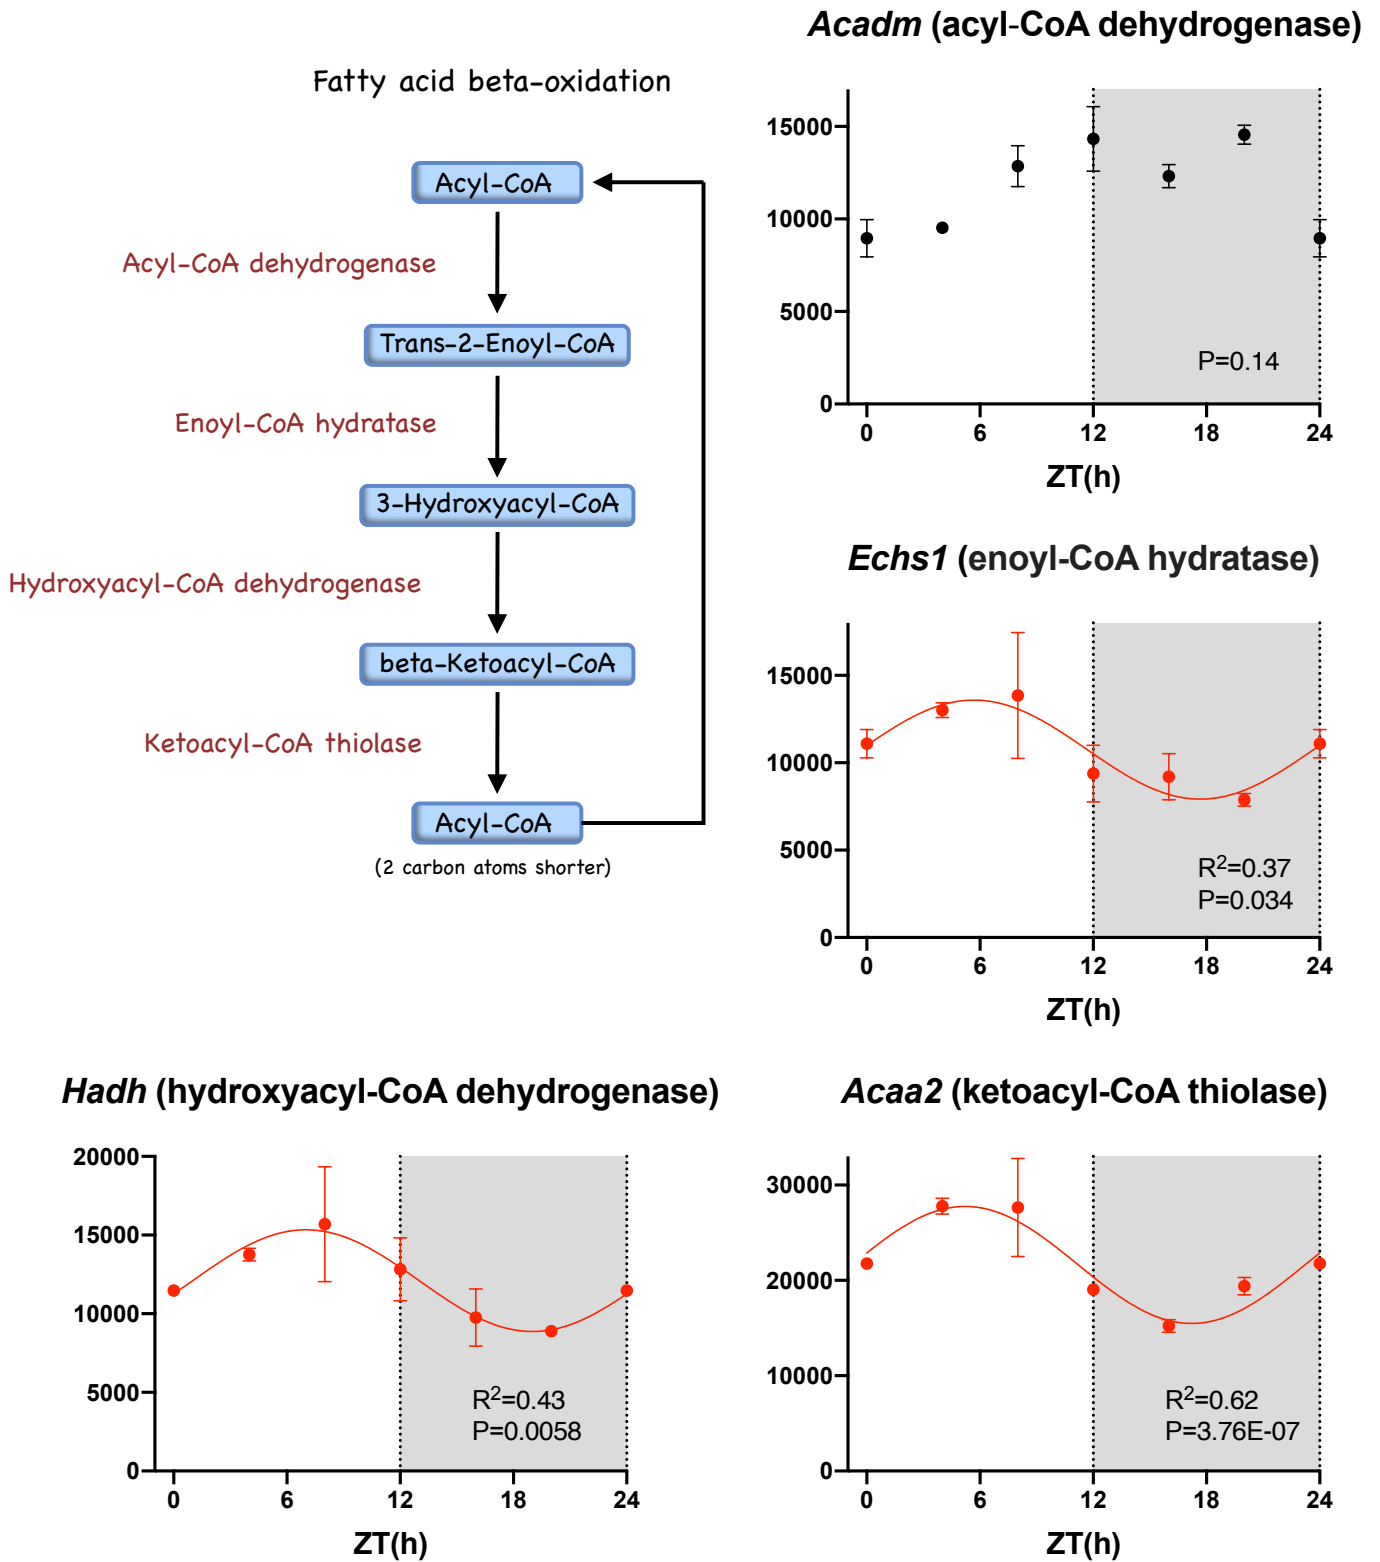

**Fig. S13. Fatty acid  $\beta$ -oxidation.** Abundance (normalised counts) of fatty acid  $\beta$ -oxidation transcripts is shown over 24 h. Gene name and common name (in parenthesis) given; mean  $\pm$  SEM transcript abundance shown (n=3) at six ZT time points over 24 h (24 h data repeat of 0 h data); significant data ( $P < 0.05$ ) or data showing a trend towards significance ( $0.05 < P < 0.1$ ) have been fitted with a sine wave by a least squares fitting method and the  $R^2$  value is given; the permutation-based P value from JTK Cycle for significance of a day-night rhythm is given; significant data are shown in red and non-significant data are shown in black. The inset shows a schematic diagram of fatty acid  $\beta$ -oxidation.

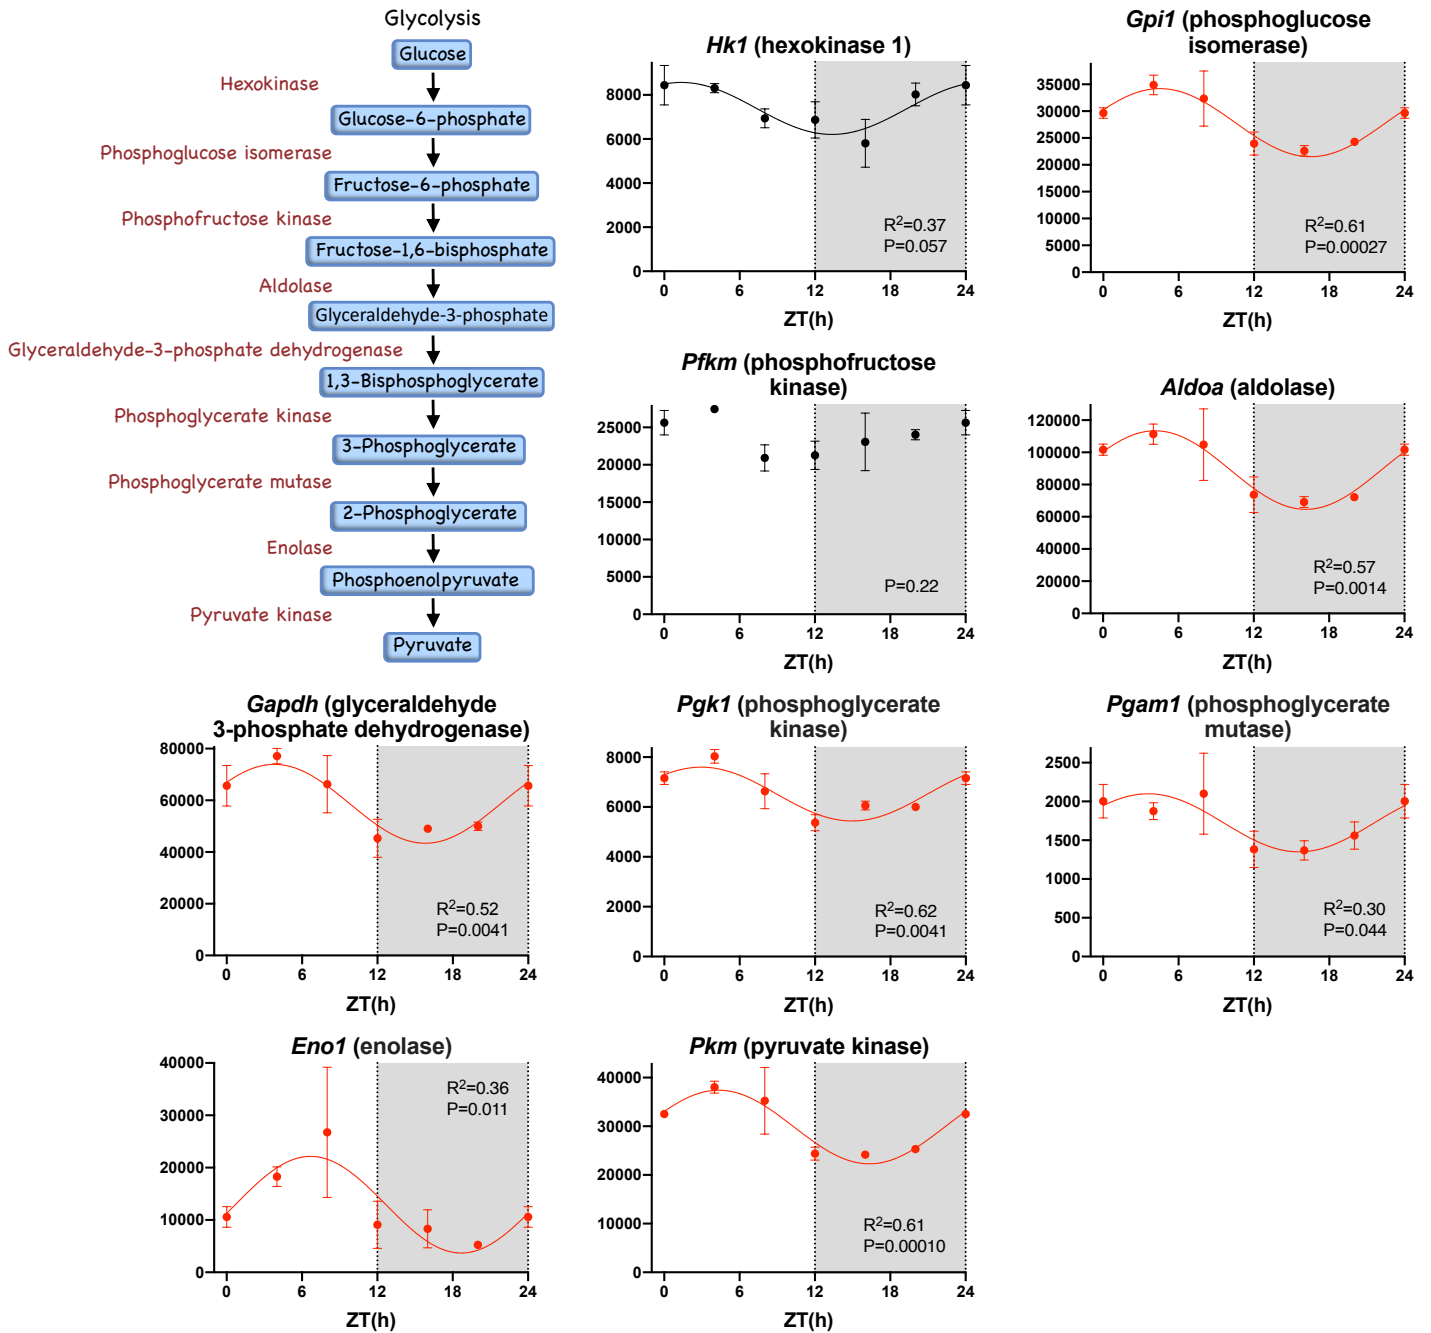

**Fig. S14. Glycolysis.** Abundance (normalised counts) of glycolysis transcripts is shown over 24 h. Gene name and common name (in parenthesis) given; mean  $\pm$  SEM transcript abundance shown (n=3) at six ZT time points over 24 h (24 h data repeat of 0 h data); significant data ( $P < 0.05$ ) or data showing a trend towards significance ( $0.05 < P < 0.1$ ) have been fitted with a sine wave by a least squares fitting method and the  $R^2$  value is given; the permutation-based P value from JTK Cycle for significance of a day-night rhythm is given; significant data are shown in red and non-significant data are shown in black. The inset shows a schematic diagram of glycolysis.

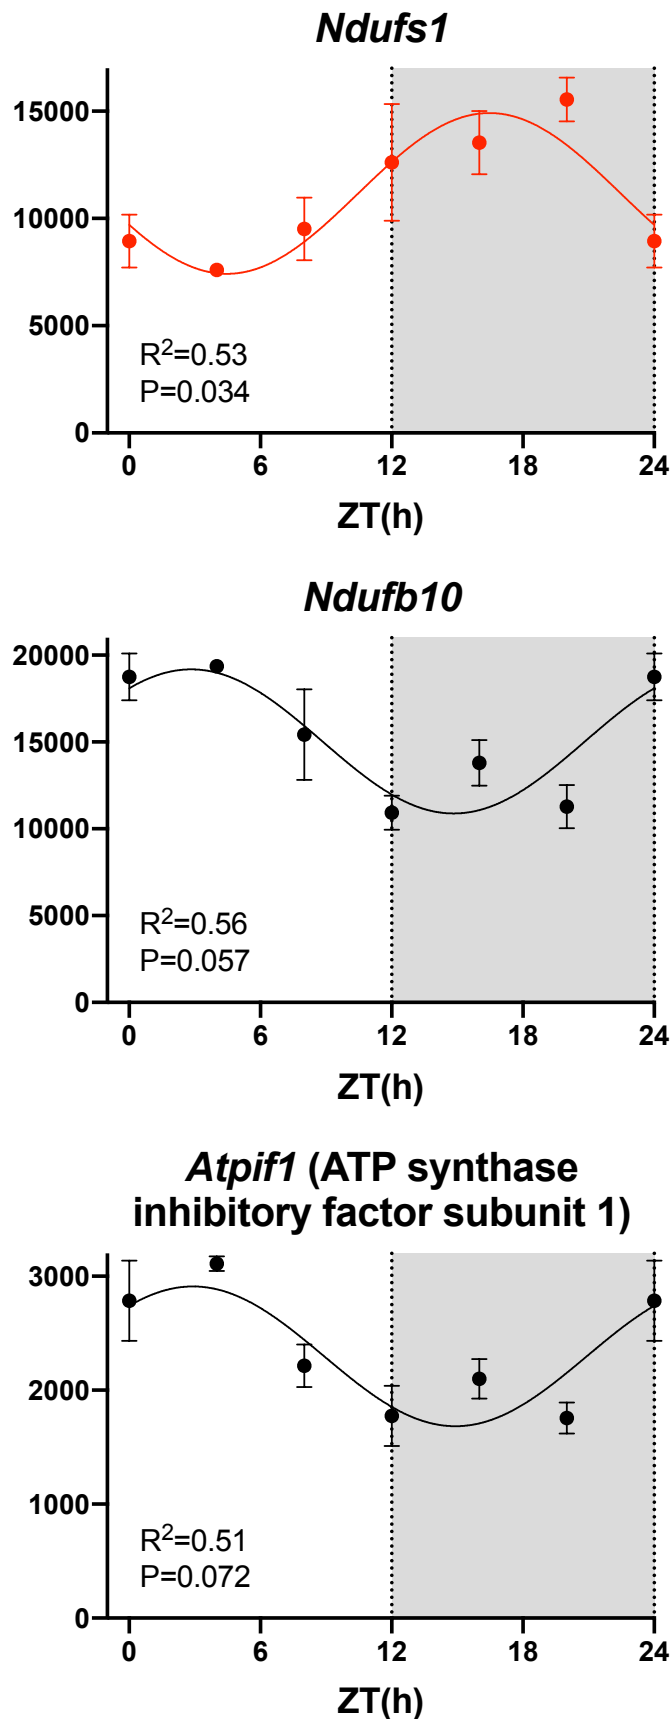

**Fig. S15. Electron transport chain.** Abundance (normalised counts) of two example electron transport chain transcripts and ATP synthase inhibitory factor subunit 1 is shown over 24 h. Gene name and common name (in parenthesis) given; mean  $\pm$  SEM transcript abundance shown (n=3) at six ZT time points over 24 h (24 h data repeat of 0 h data); significant data ( $P < 0.05$ ) or data showing a trend towards significance ( $0.05 < P < 0.1$ ) have been fitted with a sine wave by a least squares fitting method and the  $R^2$  value is given; the permutation-based P value from JTK Cycle for significance of a day-night rhythm is given; significant data are shown in red and non-significant data are shown in black.

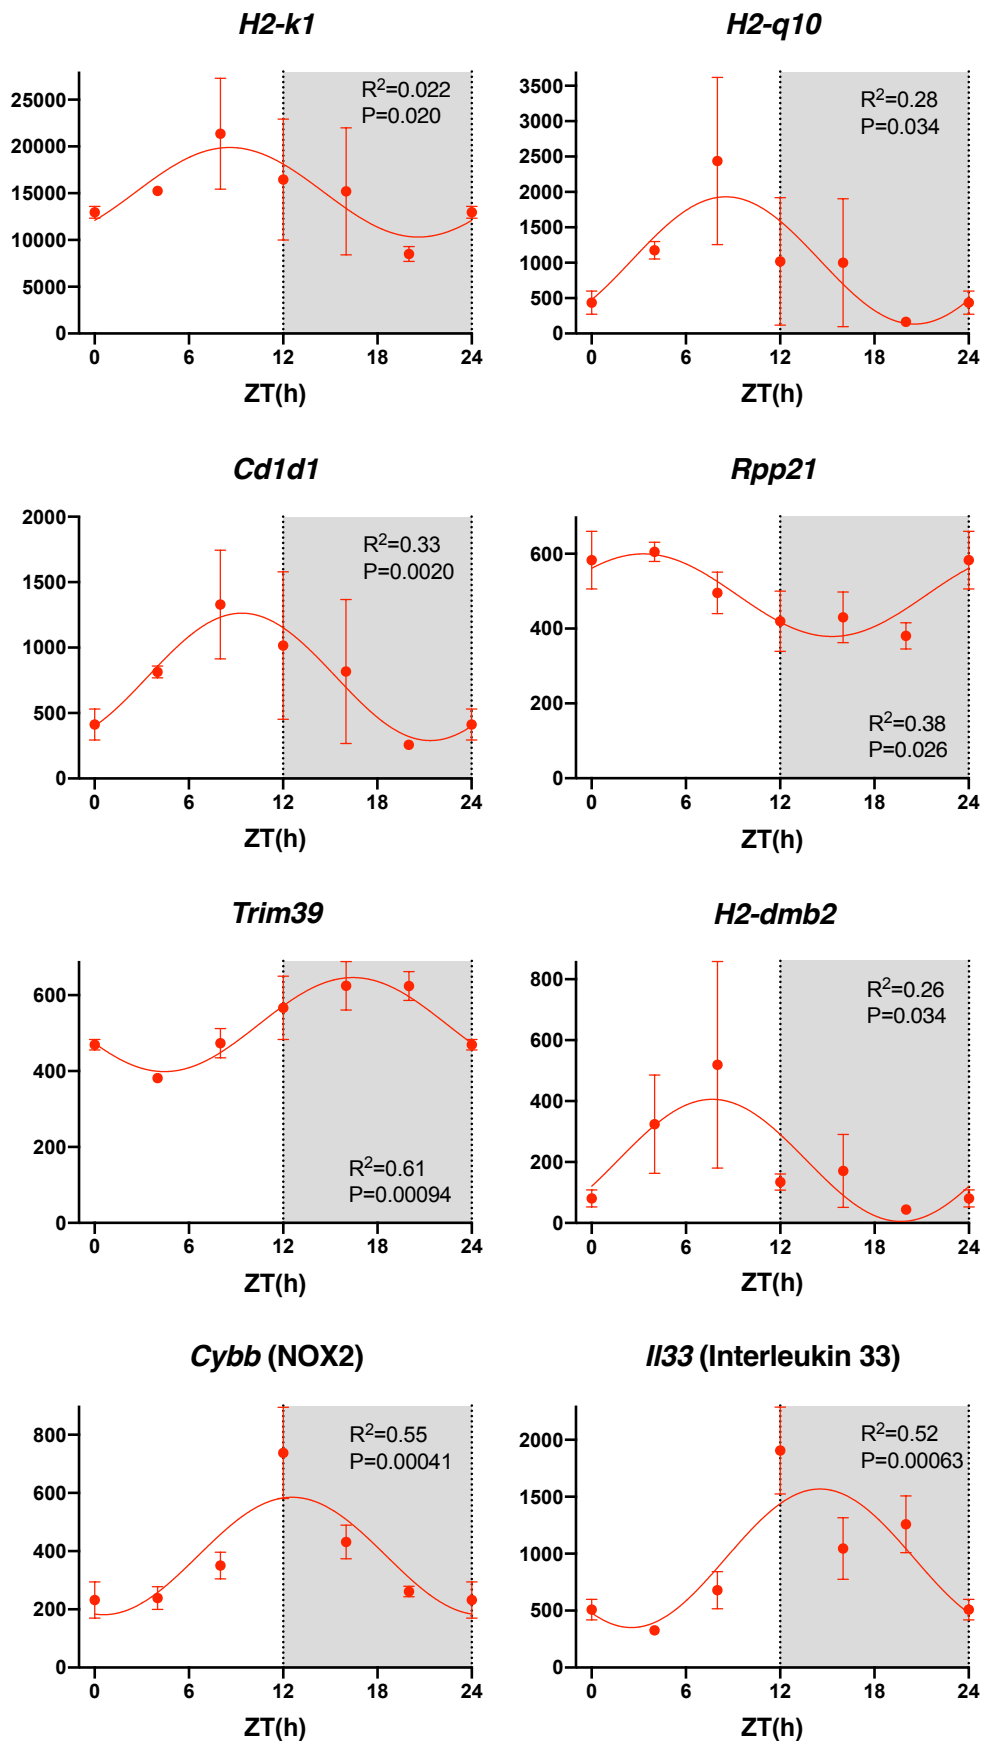

**Fig. S16. Day-night rhythm in selected transcripts related to the immune system.** Abundance (normalised counts) of transcripts shown over 24 h. Gene name and common name (in parenthesis) given; mean  $\pm$  SEM transcript abundance shown ( $n=3$ ) at six ZT time points over 24 h (24 h data repeat of 0 h data); all data are significant ( $P<0.05$ ) and have therefore been fitted with a sine wave by a least squares fitting method and the  $R^2$  value is given; the permutation-based P value from JTK Cycle for significance of a day-night rhythm is given; all data are significant and are therefore shown in red.

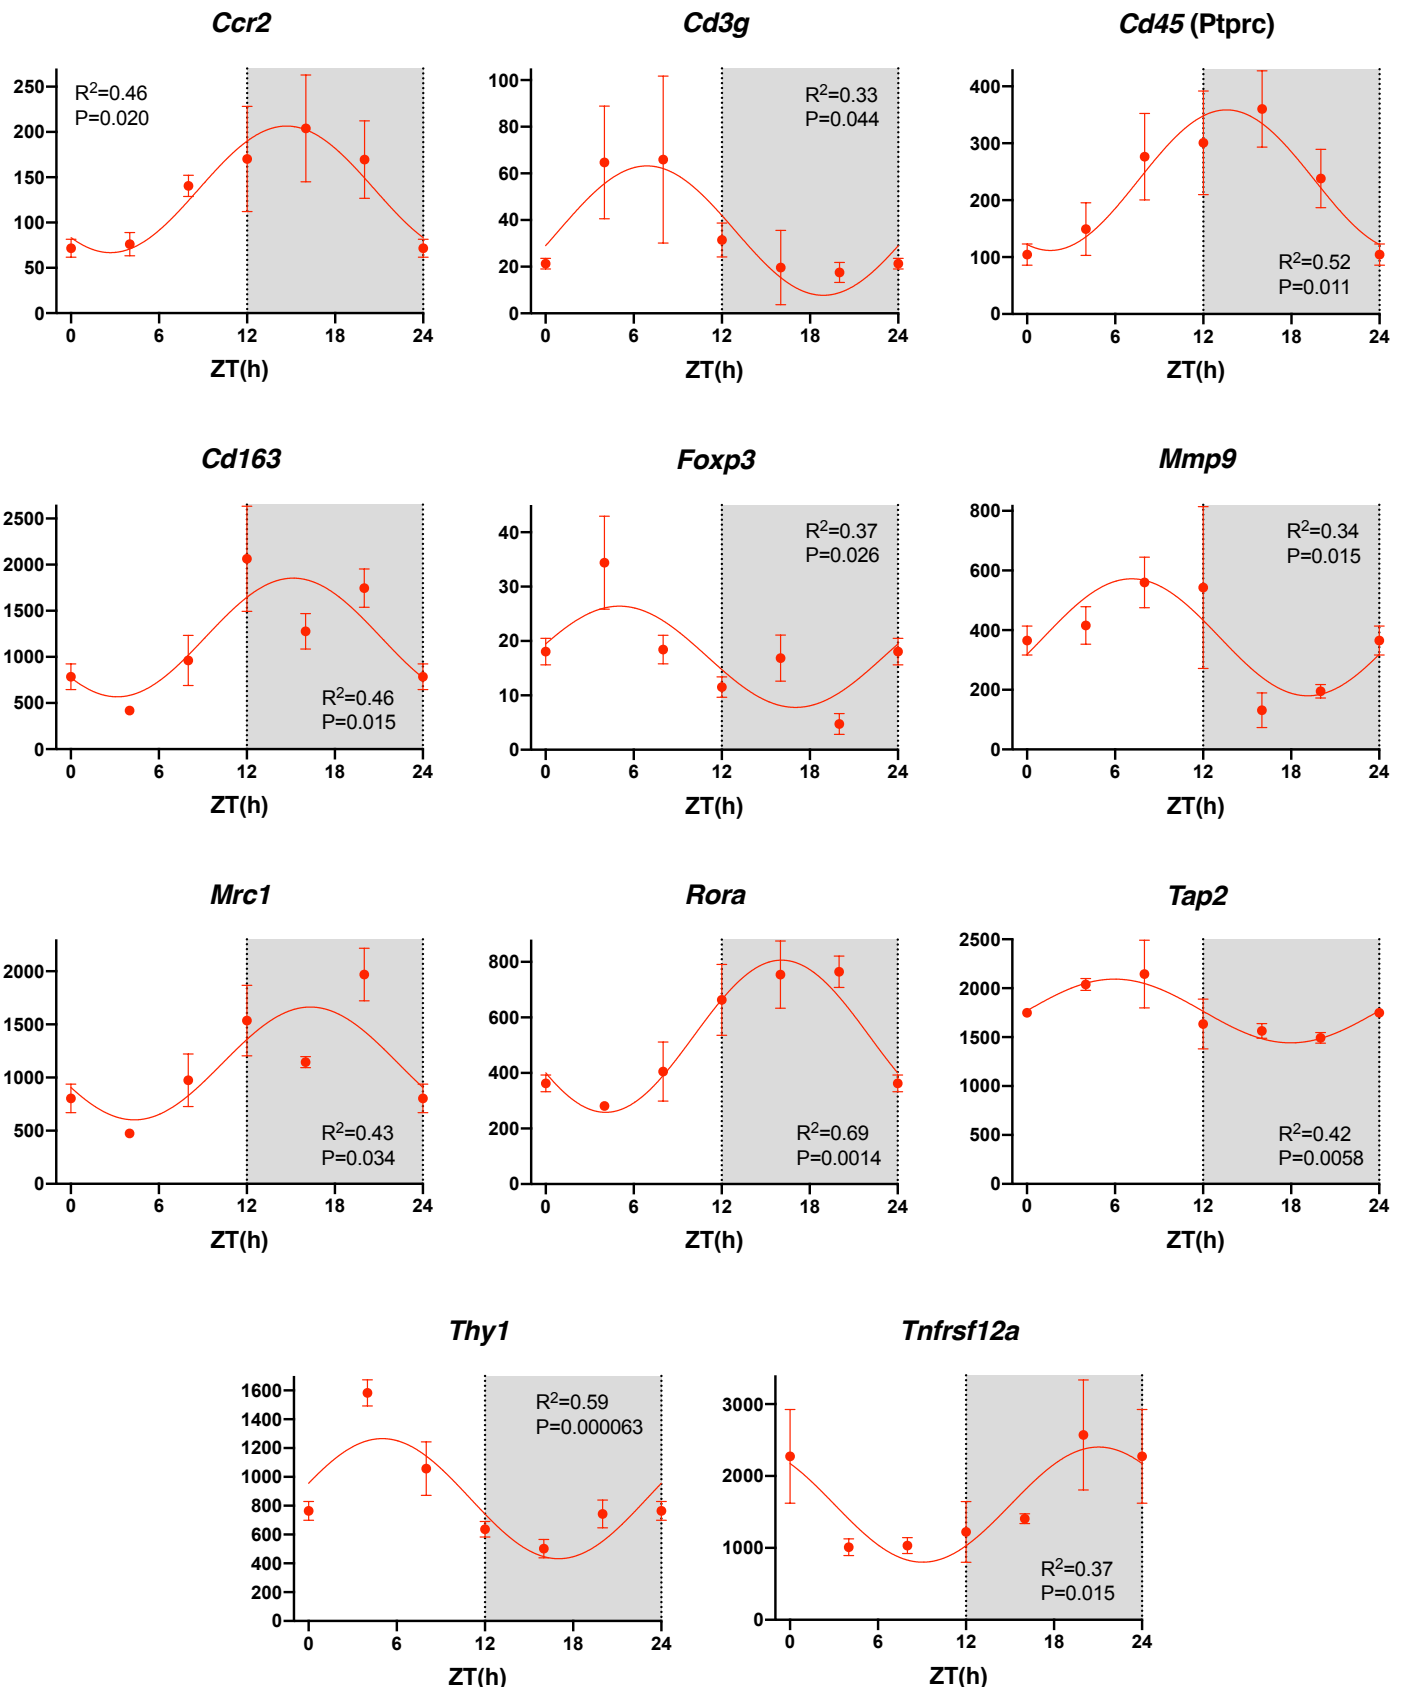

**Fig. S17. Day-night rhythm in other transcripts related to the immune system.** Abundance (normalised counts) of transcripts shown over 24 h. Gene name and common name (in parenthesis) given; mean  $\pm$  SEM transcript abundance shown ( $n=3$ ) at six ZT time points over 24 h (24 h data repeat of 0 h data); all data are significant ( $P<0.05$ ) and have therefore been fitted with a sine wave by a least squares fitting method and the  $R^2$  value is given; the permutation-based P value from JTK Cycle for significance of a day-night rhythm is given; all data are significant and are therefore shown in red.
